# Supplementary material for: Reaction of isocyanides with a molybdenum complex containing a tridentate silyl-phosphine ligand: the Si ligand effect on site preference of the isocyanide ligands
Source: Royal Society of Chemistry journal article supplement (doi:10.1039/b819837c), 2009-01-01
Supplement: b819837c.pdf [file b819837c.pdf]

Sample: SC0466

X-ray Structure Report

for

Prof. Minato

Yokohama National University

April 2, 2009

## *Experimental*

### Data Collection

A yellow prism crystal of  $C_{78}H_{76}MoNP_4Si$  having approximate dimensions of 0.16 x 0.08 x 0.06 mm was mounted on a glass fiber. All measurements were made on a Rigaku Saturn CCD area detector with graphite monochromated Mo- $K\alpha$  radiation.

Indexing was performed from 10 images that were exposed for 60 seconds. The crystal-to-detector distance was 49.97 mm.

Cell constants and an orientation matrix for data collection corresponded to a primitive triclinic cell with dimensions:

$$\begin{array}{ll} a = 12.916(3) \text{ \AA} & \alpha = 78.492(6)^\circ \\ b = 13.954(3) \text{ \AA} & \beta = 83.694(7)^\circ \\ c = 18.290(4) \text{ \AA} & \gamma = 86.519(7)^\circ \\ V = 3207.8(13) \text{ \AA}^3 & \end{array}$$

For  $Z = 2$  and F.W. = 1275.39, the calculated density is 1.320 g/cm<sup>3</sup>. Based on a statistical analysis of intensity distribution, and the successful solution and refinement of the structure, the space group was determined to be:

P-1 (#2)

The data were collected at a temperature of  $-160 \pm 1^\circ\text{C}$  to a maximum  $2\theta$  value of  $50.1^\circ$ . A total of 720 oscillation images were collected. A sweep of data was done using  $\omega$  scans from  $-110.0$  to  $70.0^\circ$  in  $0.5^\circ$  step, at  $\chi=45.0^\circ$  and  $\phi = 0.0^\circ$ . The exposure rate was 120.0 [sec./ $^\circ$ ]. The detector swing angle was  $-20.25^\circ$ . A second sweep was performed using  $\omega$  scans from  $-110.0$  to  $70.0^\circ$  in  $0.5^\circ$  step, at  $\chi=45.0^\circ$  and  $\phi = 90.0^\circ$ . The exposure rate was 120.0 [sec./ $^\circ$ ]. The detector swing angle was  $-20.25^\circ$ . The crystal-to-detector distance was 49.97 mm. Readout was performed in the 0.547 mm pixel mode.

## Data Reduction

Of the 17709 reflections that were collected, 10486 were unique ( $R_{\text{int}} = 0.046$ ); equivalent reflections were merged. Data were collected and processed using CrystalClear (Rigaku). Net intensities and sigmas were derived as follows:

$$F^2 = [\Sigma(P_i - mB_{\text{ave}})] \cdot Lp^{-1}$$

where  $P_i$  is the value in counts of the  $i^{\text{th}}$  pixel  
 $m$  is the number of pixels in the integration area  
 $B_{\text{ave}}$  is the background average  
 $Lp$  is the Lorentz and polarization factor

$$B_{\text{ave}} = \Sigma(B_j)/n$$

where  $n$  is the number of pixels in the background area  
 $B_j$  is the value of the  $j^{\text{th}}$  pixel in counts

$$\sigma^2(F^2_{\text{hkl}}) = [(\Sigma P_i) + m((\Sigma(B_{\text{ave}} - B_j)^2)/(n-1))] \cdot Lp \cdot \text{errmul} + (\text{erradd} \cdot F^2)^2$$

where  $\text{erradd} = 0.03$   
 $\text{errmul} = 2.70$

The linear absorption coefficient,  $\mu$ , for Mo- $K\alpha$  radiation is  $3.683 \text{ cm}^{-1}$ . An empirical absorption correction was applied which resulted in transmission factors ranging from 0.880 to 0.978. The data were corrected for Lorentz and polarization effects.

## Structure Solution and Refinement

The structure was solved by direct methods<sup>2</sup> and expanded using Fourier techniques<sup>3</sup>. Some non-hydrogen atoms were refined anisotropically, while the rest were refined isotropically. Hydrogen atoms were refined using the riding model. The final cycle of full-matrix least-squares refinement<sup>4</sup> on  $F^2$  was based on 10486 observed reflections and 762 variable parameters and converged (largest parameter shift was 0.00 times its esd) with unweighted and weighted agreement factors of:

$$R1 = \Sigma ||F_o| - |F_c|| / \Sigma |F_o| = 0.0625$$

$$wR2 = [ \sum ( w (F_o^2 - F_c^2)^2 ) / \sum w(F_o^2)^2 ]^{1/2} = 0.1529$$

The standard deviation of an observation of unit weight<sup>5</sup> was 1.03. Unit weights were used. The maximum and minimum peaks on the final difference Fourier map corresponded to 0.84 and -0.79 e<sup>-</sup>/Å<sup>3</sup>, respectively.

Neutral atom scattering factors were taken from Cromer and Waber<sup>6</sup>. Anomalous dispersion effects were included in Fcalc<sup>7</sup>; the values for Δf' and Δf'' were those of Creagh and McAuley<sup>8</sup>. The values for the mass attenuation coefficients are those of Creagh and Hubbell<sup>9</sup>. All calculations were performed using the CrystalStructure<sup>10</sup> crystallographic software package except for refinement, which was performed using SHELXL-97<sup>11</sup>.

### References

- (1) CrystalClear: Rigaku Corporation, 1999. CrystalClear Software User's Guide, Molecular Structure Corporation, (c) 2000. J.W. Pflugrath (1999) Acta Cryst. D55, 1718-1725.
- (2) SIR2002: Burla, M.C., Camalli, M., Carrozzini, B., Cascarano, G.L., Giacovazzo, C., Polidori, G., Spagna, R. (2003).
- (3) DIRDIF99: Beurskens, P.T., Admiraal, G., Beurskens, G., Bosman, W.P., de Gelder, R., Israel, R. and Smits, J.M.M. (1999). The DIRDIF-99 program system, Technical Report of the Crystallography Laboratory, University of Nijmegen, The Netherlands.
- (4) Least Squares function minimized: (SHELXL97)

$$\sum w(F_o^2 - F_c^2)^2 \quad \text{where } w = \text{Least Squares weights.}$$

- (5) Standard deviation of an observation of unit weight:

$$[\sum w(F_o^2 - F_c^2)^2 / (N_o - N_v)]^{1/2}$$

where:         $N_o$  = number of observations  
                $N_v$  = number of variables

(6) Cromer, D. T. & Waber, J. T.; "International Tables for X-ray Crystallography", Vol. IV, The Kynoch Press, Birmingham, England, Table 2.2 A (1974).

(7) Ibers, J. A. & Hamilton, W. C.; Acta Crystallogr., 17, 781 (1964).

(8) Creagh, D. C. & McAuley, W.J .; "International Tables for Crystallography", Vol C, (A.J.C. Wilson, ed.), Kluwer Academic Publishers, Boston, Table 4.2.6.8, pages 219-222 (1992).

(9) Creagh, D. C. & Hubbell, J.H.; "International Tables for Crystallography", Vol C, (A.J.C. Wilson, ed.), Kluwer Academic Publishers, Boston, Table 4.2.4.3, pages 200-206 (1992).

(10) CrystalStructure 3.8: Crystal Structure Analysis Package, Rigaku and Rigaku Americas (2000-2007). 9009 New Trails Dr. The Woodlands TX 77381 USA.

(11) SHELX97: Sheldrick, G.M. (1997).

## EXPERIMENTAL DETAILS

### A. Crystal Data

|                      |                                                                                                                                                 |
|----------------------|-------------------------------------------------------------------------------------------------------------------------------------------------|
| Empirical Formula    | C <sub>78</sub> H <sub>76</sub> MoNP <sub>4</sub> Si                                                                                            |
| Formula Weight       | 1275.39                                                                                                                                         |
| Crystal Color, Habit | yellow, prism                                                                                                                                   |
| Crystal Dimensions   | 0.16 X 0.08 X 0.06 mm                                                                                                                           |
| Crystal System       | triclinic                                                                                                                                       |
| Lattice Type         | Primitive                                                                                                                                       |
| Indexing Images      | 10 images @ 60.0 seconds                                                                                                                        |
| Detector Position    | 49.97 mm                                                                                                                                        |
| Pixel Size           | 0.137 mm                                                                                                                                        |
| Lattice Parameters   | a = 12.916(3) Å<br>b = 13.954(3) Å<br>c = 18.290(4) Å<br>α = 78.492(6) °<br>β = 83.694(7) °<br>γ = 86.519(7) °<br>V = 3207.8(13) Å <sup>3</sup> |
| Space Group          | P-1 (#2)                                                                                                                                        |
| Z value              | 2                                                                                                                                               |
| D <sub>calc</sub>    | 1.320 g/cm <sup>3</sup>                                                                                                                         |
| F <sub>000</sub>     | 1334.00                                                                                                                                         |
| μ(MoKα)              | 3.683 cm <sup>-1</sup>                                                                                                                          |

## B. Intensity Measurements

|                                                       |                                                                            |
|-------------------------------------------------------|----------------------------------------------------------------------------|
| Detector<br>Goniometer                                | Rigaku Saturn<br>Rigaku AFC10                                              |
| Radiation                                             | MoK $\alpha$ ( $\lambda = 0.71075 \text{ \AA}$ )<br>graphite monochromated |
| Detector Aperture                                     | 70 mm x 70 mm                                                              |
| Data Images                                           | 720 exposures                                                              |
| $\omega$ oscillation Range ( $\chi=45.0, \phi=0.0$ )  | -110.0 - 70.0 $^\circ$                                                     |
| Exposure Rate                                         | 120.0 sec./ $^\circ$                                                       |
| Detector Swing Angle                                  | -20.25 $^\circ$                                                            |
| $\omega$ oscillation Range ( $\chi=45.0, \phi=90.0$ ) | -110.0 - 70.0 $^\circ$                                                     |
| Exposure Rate                                         | 120.0 sec./ $^\circ$                                                       |
| Detector Swing Angle                                  | -20.25 $^\circ$                                                            |
| Detector Position                                     | 49.97 mm                                                                   |
| Pixel Size                                            | 0.137 mm                                                                   |
| $2\theta_{\text{max}}$                                | 50.1 $^\circ$                                                              |
| No. of Reflections Measured                           | Total: 17709<br>Unique: 10486 ( $R_{\text{int}} = 0.046$ )                 |
| Corrections                                           | Lorentz-polarization<br>Absorption<br>(trans. factors: 0.880 - 0.978)      |

### C. Structure Solution and Refinement

|                                       |                                                                                                                        |
|---------------------------------------|------------------------------------------------------------------------------------------------------------------------|
| Structure Solution                    | Direct Methods                                                                                                         |
| Refinement                            | Full-matrix least-squares on F <sup>2</sup>                                                                            |
| Function Minimized                    | $\sum w (F_o^2 - F_c^2)^2$                                                                                             |
| Least Squares Weights                 | $w = 1 / [ \sigma^2(F_o^2) + (0.0483 \cdot P)^2 + 9.2490 \cdot P ]$<br>where $P = (\text{Max}(F_o^2, 0) + 2F_c^2) / 3$ |
| 2 $\theta_{\text{max}}$ cutoff        | 50.1°                                                                                                                  |
| Anomalous Dispersion                  | All non-hydrogen atoms                                                                                                 |
| No. Observations (All reflections)    | 10486                                                                                                                  |
| No. Variables                         | 762                                                                                                                    |
| Reflection/Parameter Ratio            | 13.76                                                                                                                  |
| Residuals: R1 ( $I > 2.00\sigma(I)$ ) | 0.0625                                                                                                                 |
| Residuals: R (All reflections)        | 0.0953                                                                                                                 |
| Residuals: wR2 (All reflections)      | 0.1529                                                                                                                 |
| Goodness of Fit Indicator             | 1.033                                                                                                                  |
| Max Shift/Error in Final Cycle        | 0.000                                                                                                                  |
| Maximum peak in Final Diff. Map       | 0.84 e <sup>-</sup> /Å <sup>3</sup>                                                                                    |
| Minimum peak in Final Diff. Map       | -0.79 e <sup>-</sup> /Å <sup>3</sup>                                                                                   |



Table 1. Atomic coordinates and  $B_{\text{iso}}/B_{\text{eq}}$  and occupancy

| atom  | x           | y           | z          | $B_{\text{eq}}$ | occ |
|-------|-------------|-------------|------------|-----------------|-----|
| Mo(1) | 0.26673(3)  | 0.26235(3)  | 0.28651(2) | 1.332(10)       |     |
| P(1)  | 0.37234(10) | 0.13693(9)  | 0.36297(7) | 1.34(2)         |     |
| P(2)  | 0.12521(10) | 0.15733(10) | 0.36326(8) | 1.59(2)         |     |
| P(3)  | 0.14970(10) | 0.37909(10) | 0.21495(7) | 1.34(2)         |     |
| P(4)  | 0.24203(10) | 0.39156(10) | 0.36554(7) | 1.44(2)         |     |
| Si(1) | 0.38232(10) | 0.35592(10) | 0.17632(8) | 1.45(2)         |     |
| N(1)  | 0.2762(3)   | 0.1489(3)   | 0.1501(2)  | 2.14(8)         |     |
| C(1)  | 0.2739(3)   | 0.1885(3)   | 0.2030(2)  | 1.71(9)         |     |
| C(2A) | 0.2782(9)   | 0.0998(9)   | 0.0888(6)  | 2.7(2)          | 1/2 |
| C(2B) | 0.3127(9)   | 0.1542(8)   | 0.0696(6)  | 2.3(2)          | 1/2 |
| C(3A) | 0.3710(10)  | 0.1268(10)  | 0.0336(7)  | 3.5(2)          | 1/2 |
| C(3B) | 0.3654(9)   | 0.0560(9)   | 0.0589(7)  | 3.1(2)          | 1/2 |
| C(4A) | 0.3723(9)   | 0.0730(9)   | -0.0329(6) | 3.0(2)          | 1/2 |
| C(4B) | 0.2895(12)  | -0.0202(11) | 0.0706(9)  | 5.5(3)          | 1/2 |
| C(5A) | 0.2715(9)   | 0.0984(9)   | -0.0686(7) | 3.1(2)          | 1/2 |
| C(5B) | 0.1999(14)  | 0.0119(14)  | 0.0173(10) | 6.3(4)          | 1/2 |
| C(6A) | 0.1731(11)  | 0.0780(11)  | -0.0168(8) | 4.0(2)          | 1/2 |
| C(6B) | 0.1517(14)  | 0.1076(13)  | 0.0371(11) | 5.1(4)          | 1/2 |
| C(7A) | 0.1781(13)  | 0.1325(14)  | 0.0522(9)  | 4.5(3)          | 1/2 |
| C(7B) | 0.2245(9)   | 0.1842(9)   | 0.0193(7)  | 2.8(2)          | 1/2 |
| C(8)  | 0.2895(3)   | 0.0650(3)   | 0.4417(2)  | 1.70(9)         |     |
| C(9)  | 0.1885(3)   | 0.0433(3)   | 0.4138(2)  | 1.77(9)         |     |
| C(10) | 0.1442(3)   | 0.4967(3)   | 0.2457(2)  | 1.71(9)         |     |
| C(11) | 0.1346(3)   | 0.4765(3)   | 0.3315(2)  | 1.72(9)         |     |
| C(12) | 0.4405(3)   | 0.0345(3)   | 0.3241(2)  | 1.59(8)         |     |
| C(13) | 0.5440(4)   | 0.0049(3)   | 0.3345(3)  | 1.94(9)         |     |
| C(14) | 0.5926(4)   | -0.0706(4)  | 0.3027(3)  | 2.16(10)        |     |
| C(15) | 0.5400(4)   | -0.1201(4)  | 0.2617(3)  | 2.59(10)        |     |
| C(16) | 0.4381(4)   | -0.0923(4)  | 0.2508(3)  | 2.33(10)        |     |
| C(17) | 0.3888(4)   | -0.0154(3)  | 0.2810(2)  | 1.70(9)         |     |
| C(18) | 0.4799(3)   | 0.1710(3)   | 0.4093(2)  | 1.53(8)         |     |
| C(19) | 0.5611(3)   | 0.2234(3)   | 0.3648(2)  | 1.74(9)         |     |
| C(20) | 0.6440(4)   | 0.2508(4)   | 0.3970(3)  | 2.23(10)        |     |
| C(21) | 0.6463(4)   | 0.2296(4)   | 0.4733(3)  | 2.37(10)        |     |
| C(22) | 0.5658(4)   | 0.1788(4)   | 0.5181(3)  | 2.14(9)         |     |
| C(23) | 0.4850(3)   | 0.1475(3)   | 0.4862(2)  | 1.58(8)         |     |
| C(24) | 0.0274(3)   | 0.0973(3)   | 0.3231(3)  | 1.83(9)         |     |

Table 1. Atomic coordinates and  $B_{\text{iso}}/B_{\text{eq}}$  and occupancy (continued)

| atom  | x          | y          | z          | $B_{\text{eq}}$ | occ |
|-------|------------|------------|------------|-----------------|-----|
| C(25) | 0.0601(4)  | 0.0522(3)  | 0.2625(3)  | 2.00(9)         |     |
| C(26) | -0.0079(4) | 0.0031(4)  | 0.2311(3)  | 2.48(10)        |     |
| C(27) | -0.1117(4) | -0.0013(4) | 0.2600(3)  | 3.04(12)        |     |
| C(28) | -0.1459(4) | 0.0432(4)  | 0.3189(3)  | 3.04(12)        |     |
| C(29) | -0.0776(4) | 0.0923(4)  | 0.3511(3)  | 2.53(10)        |     |
| C(30) | 0.0420(3)  | 0.2021(4)  | 0.4391(2)  | 1.88(9)         |     |
| C(31) | 0.0465(4)  | 0.1624(4)  | 0.5150(3)  | 2.29(10)        |     |
| C(32) | -0.0205(4) | 0.1981(4)  | 0.5689(3)  | 2.67(11)        |     |
| C(33) | -0.0917(4) | 0.2739(4)  | 0.5481(3)  | 2.82(11)        |     |
| C(34) | -0.0967(4) | 0.3140(4)  | 0.4724(3)  | 2.34(10)        |     |
| C(35) | -0.0305(3) | 0.2783(3)  | 0.4193(3)  | 1.98(9)         |     |
| C(36) | 0.0103(3)  | 0.3589(3)  | 0.2109(2)  | 1.53(8)         |     |
| C(37) | -0.0714(4) | 0.4174(4)  | 0.2357(2)  | 2.00(9)         |     |
| C(38) | -0.1746(4) | 0.3966(4)  | 0.2302(3)  | 2.56(11)        |     |
| C(39) | -0.1959(4) | 0.3187(4)  | 0.1992(3)  | 2.52(10)        |     |
| C(40) | -0.1156(4) | 0.2614(4)  | 0.1738(3)  | 2.34(10)        |     |
| C(41) | -0.0126(3) | 0.2806(4)  | 0.1794(2)  | 1.97(9)         |     |
| C(42) | 0.1915(3)  | 0.4122(3)  | 0.1153(2)  | 1.67(9)         |     |
| C(43) | 0.1264(4)  | 0.4561(4)  | 0.0602(3)  | 2.15(10)        |     |
| C(44) | 0.1656(4)  | 0.4780(4)  | -0.0143(3) | 2.19(10)        |     |
| C(45) | 0.2684(4)  | 0.4548(3)  | -0.0349(2) | 1.95(9)         |     |
| C(46) | 0.3339(4)  | 0.4138(3)  | 0.0184(2)  | 1.82(9)         |     |
| C(47) | 0.2979(3)  | 0.3924(3)  | 0.0953(2)  | 1.51(8)         |     |
| C(48) | 0.3454(3)  | 0.4771(3)  | 0.3669(2)  | 1.67(9)         |     |
| C(49) | 0.4364(3)  | 0.4399(3)  | 0.3993(2)  | 1.84(9)         |     |
| C(50) | 0.5114(4)  | 0.5018(4)  | 0.4087(3)  | 2.42(10)        |     |
| C(51) | 0.4980(4)  | 0.6018(4)  | 0.3872(3)  | 2.81(11)        |     |
| C(52) | 0.4103(4)  | 0.6394(4)  | 0.3532(3)  | 2.62(10)        |     |
| C(53) | 0.3349(4)  | 0.5779(3)  | 0.3425(2)  | 1.97(9)         |     |
| C(54) | 0.2064(3)  | 0.3710(3)  | 0.4680(2)  | 1.59(8)         |     |
| C(55) | 0.2640(4)  | 0.2997(3)  | 0.5133(3)  | 2.07(9)         |     |
| C(56) | 0.2514(4)  | 0.2885(4)  | 0.5900(3)  | 2.31(10)        |     |
| C(57) | 0.1810(4)  | 0.3480(4)  | 0.6246(3)  | 2.62(11)        |     |
| C(58) | 0.1218(4)  | 0.4172(4)  | 0.5816(3)  | 2.89(12)        |     |
| C(59) | 0.1346(4)  | 0.4294(4)  | 0.5038(3)  | 2.21(10)        |     |
| C(60) | 0.4381(3)  | 0.4804(3)  | 0.1763(2)  | 1.60(9)         |     |
| C(61) | 0.4026(4)  | 0.5671(3)  | 0.1331(3)  | 2.11(9)         |     |

Table 1. Atomic coordinates and  $B_{\text{iso}}/B_{\text{eq}}$  and occupancy (continued)

| atom  | x          | y         | z         | $B_{\text{eq}}$ | occ |
|-------|------------|-----------|-----------|-----------------|-----|
| C(62) | 0.4516(4)  | 0.6553(4) | 0.1277(3) | 2.62(10)        |     |
| C(63) | 0.5372(4)  | 0.6577(4) | 0.1657(3) | 2.55(11)        |     |
| C(64) | 0.5727(4)  | 0.5727(4) | 0.2111(3) | 2.44(10)        |     |
| C(65) | 0.5236(3)  | 0.4862(4) | 0.2160(2) | 1.93(9)         |     |
| C(66) | 0.5034(3)  | 0.2911(3) | 0.1377(2) | 1.62(9)         |     |
| C(67) | 0.5278(3)  | 0.1916(3) | 0.1621(2) | 1.77(9)         |     |
| C(68) | 0.6150(4)  | 0.1444(4) | 0.1323(3) | 2.17(10)        |     |
| C(69) | 0.6816(3)  | 0.1965(4) | 0.0756(2) | 2.03(9)         |     |
| C(70) | 0.6612(3)  | 0.2947(4) | 0.0508(3) | 2.05(9)         |     |
| C(71) | 0.5741(3)  | 0.3414(4) | 0.0813(2) | 1.97(9)         |     |
| C(72) | 0.1102(5)  | 0.7626(4) | 0.1805(3) | 3.40(12)        |     |
| C(73) | 0.0075(5)  | 0.7462(4) | 0.2085(3) | 3.62(13)        |     |
| C(74) | -0.0621(5) | 0.7124(5) | 0.1672(3) | 4.17(14)        |     |
| C(75) | -0.0279(6) | 0.6957(5) | 0.0967(4) | 4.40(15)        |     |
| C(76) | 0.0731(6)  | 0.7123(5) | 0.0673(4) | 4.59(16)        |     |
| C(77) | 0.1414(5)  | 0.7456(5) | 0.1093(3) | 4.15(14)        |     |
| C(78) | 0.1853(5)  | 0.7963(5) | 0.2248(4) | 4.70(16)        |     |

$$B_{\text{eq}} = 8/3 \pi^2 (U_{11}(aa^*)^2 + U_{22}(bb^*)^2 + U_{33}(cc^*)^2 + 2U_{12}(aa^*bb^*)\cos \gamma + 2U_{13}(aa^*cc^*)\cos \beta + 2U_{23}(bb^*cc^*)\cos \alpha)$$

Table 2. Atomic coordinates and  $B_{\text{iso}}$  involving hydrogens/ $B_{\text{eq}}$  and occupancy

| atom   | x      | y       | z       | $B_{\text{eq}}$ | occ |
|--------|--------|---------|---------|-----------------|-----|
| H(1A)  | 0.2795 | 0.0274  | 0.1076  | 3.23            | 1/2 |
| H(1B)  | 0.3663 | 0.2051  | 0.0551  | 2.75            | 1/2 |
| H(2A)  | 0.4355 | 0.1089  | 0.0587  | 4.17            | 1/2 |
| H(2B)  | 0.4011 | 0.0631  | 0.0075  | 3.77            | 1/2 |
| H(3A)  | 0.3688 | 0.1984  | 0.0146  | 4.17            | 1/2 |
| H(3B)  | 0.4186 | 0.0368  | 0.0947  | 3.77            | 1/2 |
| H(4A)  | 0.4323 | 0.0934  | -0.0702 | 3.55            | 1/2 |
| H(4B)  | 0.2590 | -0.0324 | 0.1236  | 6.55            | 1/2 |
| H(5A)  | 0.3795 | 0.0014  | -0.0147 | 3.55            | 1/2 |
| H(5B)  | 0.3246 | -0.0818 | 0.0602  | 6.55            | 1/2 |
| H(6A)  | 0.2703 | 0.1689  | -0.0917 | 3.67            | 1/2 |
| H(6B)  | 0.2289 | 0.0224  | -0.0360 | 7.54            | 1/2 |
| H(7A)  | 0.2713 | 0.0614  | -0.1095 | 3.67            | 1/2 |
| H(7B)  | 0.1471 | -0.0387 | 0.0260  | 7.54            | 1/2 |
| H(8A)  | 0.1674 | 0.0066  | 0.0017  | 4.82            | 1/2 |
| H(8B)  | 0.0900 | 0.1278  | 0.0092  | 6.15            | 1/2 |
| H(9A)  | 0.1114 | 0.1027  | -0.0437 | 4.82            | 1/2 |
| H(9B)  | 0.1280 | 0.0967  | 0.0914  | 6.15            | 1/2 |
| H(10A) | 0.1765 | 0.2042  | 0.0339  | 5.39            | 1/2 |
| H(10B) | 0.1900 | 0.2466  | 0.0284  | 3.32            | 1/2 |
| H(11A) | 0.1169 | 0.1162  | 0.0893  | 5.39            | 1/2 |
| H(11B) | 0.2523 | 0.1931  | -0.0342 | 3.32            | 1/2 |
| H(12)  | 0.3268 | 0.0030  | 0.4620  | 2.04            |     |
| H(13)  | 0.2740 | 0.1026  | 0.4825  | 2.04            |     |
| H(14)  | 0.1403 | 0.0128  | 0.4569  | 2.13            |     |
| H(15)  | 0.2033 | -0.0038 | 0.3796  | 2.13            |     |
| H(16)  | 0.2082 | 0.5325  | 0.2255  | 2.06            |     |
| H(17)  | 0.0834 | 0.5373  | 0.2272  | 2.06            |     |
| H(18)  | 0.0668 | 0.4473  | 0.3515  | 2.06            |     |
| H(19)  | 0.1375 | 0.5386  | 0.3493  | 2.06            |     |
| H(20)  | 0.5817 | 0.0369  | 0.3638  | 2.33            |     |
| H(21)  | 0.6637 | -0.0882 | 0.3094  | 2.59            |     |
| H(22)  | 0.5734 | -0.1728 | 0.2412  | 3.11            |     |
| H(23)  | 0.4008 | -0.1260 | 0.2224  | 2.80            |     |
| H(24)  | 0.3187 | 0.0034  | 0.2721  | 2.04            |     |
| H(25)  | 0.5592 | 0.2402  | 0.3120  | 2.09            |     |
| H(26)  | 0.6996 | 0.2844  | 0.3660  | 2.67            |     |

Table 2. Atomic coordinates and  $B_{\text{iso}}$  involving hydrogens/ $B_{\text{eq}}$  and occupancy  
(continued)

| atom  | x       | y       | z       | $B_{\text{eq}}$ | occ |
|-------|---------|---------|---------|-----------------|-----|
| H(27) | 0.7026  | 0.2496  | 0.4953  | 2.84            |     |
| H(28) | 0.5662  | 0.1654  | 0.5711  | 2.56            |     |
| H(29) | 0.4325  | 0.1095  | 0.5172  | 1.90            |     |
| H(30) | 0.1311  | 0.0552  | 0.2422  | 2.40            |     |
| H(31) | 0.0163  | -0.0274 | 0.1901  | 2.98            |     |
| H(32) | -0.1589 | -0.0350 | 0.2388  | 3.64            |     |
| H(33) | -0.2173 | 0.0405  | 0.3381  | 3.65            |     |
| H(34) | -0.1026 | 0.1224  | 0.3922  | 3.04            |     |
| H(35) | 0.0956  | 0.1106  | 0.5299  | 2.75            |     |
| H(36) | -0.0173 | 0.1702  | 0.6204  | 3.21            |     |
| H(37) | -0.1371 | 0.2985  | 0.5852  | 3.39            |     |
| H(38) | -0.1457 | 0.3659  | 0.4577  | 2.81            |     |
| H(39) | -0.0343 | 0.3063  | 0.3678  | 2.38            |     |
| H(40) | -0.0573 | 0.4718  | 0.2565  | 2.40            |     |
| H(41) | -0.2302 | 0.4365  | 0.2479  | 3.07            |     |
| H(42) | -0.2660 | 0.3049  | 0.1954  | 3.03            |     |
| H(43) | -0.1303 | 0.2080  | 0.1521  | 2.80            |     |
| H(44) | 0.0424  | 0.2401  | 0.1616  | 2.36            |     |
| H(45) | 0.0551  | 0.4707  | 0.0743  | 2.58            |     |
| H(46) | 0.1217  | 0.5089  | -0.0513 | 2.63            |     |
| H(47) | 0.2944  | 0.4674  | -0.0864 | 2.34            |     |
| H(48) | 0.4049  | 0.3994  | 0.0030  | 2.18            |     |
| H(49) | 0.4468  | 0.3711  | 0.4150  | 2.20            |     |
| H(50) | 0.5730  | 0.4751  | 0.4303  | 2.91            |     |
| H(51) | 0.5484  | 0.6442  | 0.3957  | 3.37            |     |
| H(52) | 0.4012  | 0.7082  | 0.3368  | 3.14            |     |
| H(53) | 0.2755  | 0.6050  | 0.3182  | 2.36            |     |
| H(54) | 0.3129  | 0.2580  | 0.4907  | 2.48            |     |
| H(55) | 0.2915  | 0.2394  | 0.6196  | 2.77            |     |
| H(56) | 0.1737  | 0.3409  | 0.6776  | 3.14            |     |
| H(57) | 0.0717  | 0.4571  | 0.6050  | 3.47            |     |
| H(58) | 0.0936  | 0.4783  | 0.4746  | 2.66            |     |
| H(59) | 0.3436  | 0.5665  | 0.1064  | 2.53            |     |
| H(60) | 0.4257  | 0.7136  | 0.0977  | 3.14            |     |
| H(61) | 0.5719  | 0.7171  | 0.1610  | 3.06            |     |
| H(62) | 0.6306  | 0.5741  | 0.2386  | 2.93            |     |
| H(63) | 0.5485  | 0.4286  | 0.2474  | 2.32            |     |

Table 2. Atomic coordinates and  $B_{\text{iso}}$  involving hydrogens/ $B_{\text{eq}}$  and occupancy (continued)

| atom  | x       | y      | z      | $B_{\text{eq}}$ | occ |
|-------|---------|--------|--------|-----------------|-----|
| H(64) | 0.4826  | 0.1549 | 0.2007 | 2.12            |     |
| H(65) | 0.6290  | 0.0767 | 0.1505 | 2.60            |     |
| H(66) | 0.7410  | 0.1645 | 0.0542 | 2.43            |     |
| H(67) | 0.7071  | 0.3308 | 0.0124 | 2.46            |     |
| H(68) | 0.5618  | 0.4095 | 0.0635 | 2.36            |     |
| H(69) | -0.0161 | 0.7583 | 0.2570 | 4.35            |     |
| H(70) | -0.1322 | 0.7011 | 0.1874 | 5.00            |     |
| H(71) | -0.0746 | 0.6725 | 0.0682 | 5.28            |     |
| H(72) | 0.0963  | 0.7012 | 0.0185 | 5.51            |     |
| H(73) | 0.2113  | 0.7570 | 0.0887 | 4.97            |     |
| H(74) | 0.2454  | 0.8234 | 0.1912 | 5.64            |     |
| H(75) | 0.2089  | 0.7409 | 0.2620 | 5.64            |     |
| H(76) | 0.1514  | 0.8469 | 0.2505 | 5.64            |     |

$$B_{\text{eq}} = 8/3 \pi^2 (U_{11}(aa^*)^2 + U_{22}(bb^*)^2 + U_{33}(cc^*)^2 + 2U_{12}(aa^*bb^*)\cos \gamma + 2U_{13}(aa^*cc^*)\cos \beta + 2U_{23}(bb^*cc^*)\cos \alpha)$$

Table 3. Anisotropic displacement parameters

| atom  | U <sub>11</sub> | U <sub>22</sub> | U <sub>33</sub> | U <sub>12</sub> | U <sub>13</sub> | U <sub>23</sub> |
|-------|-----------------|-----------------|-----------------|-----------------|-----------------|-----------------|
| Mo(1) | 0.0130(2)       | 0.0177(2)       | 0.0190(2)       | -0.00316(17)    | 0.00103(17)     |                 |
|       | -0.00218(18)    |                 |                 |                 |                 |                 |
| P(1)  | 0.0134(6)       | 0.0173(6)       | 0.0195(7)       | -0.0015(5)      | -0.0009(5)      | -0.0023(5)      |
| P(2)  | 0.0139(6)       | 0.0205(7)       | 0.0243(7)       | -0.0049(5)      | 0.0021(5)       | -0.0011(5)      |
| P(3)  | 0.0139(6)       | 0.0177(6)       | 0.0187(7)       | -0.0005(5)      | -0.0005(5)      | -0.0027(5)      |
| P(4)  | 0.0147(6)       | 0.0190(6)       | 0.0207(7)       | -0.0025(5)      | 0.0018(5)       | -0.0048(5)      |
| Si(1) | 0.0143(6)       | 0.0197(7)       | 0.0193(7)       | -0.0031(5)      | 0.0025(5)       | -0.0011(6)      |
| N(1)  | 0.029(2)        | 0.028(2)        | 0.027(2)        | -0.001(2)       | -0.002(2)       | -0.012(2)       |
| C(1)  | 0.014(2)        | 0.023(2)        | 0.024(2)        | -0.000(2)       | -0.002(2)       | 0.004(2)        |
| C(8)  | 0.019(2)        | 0.019(2)        | 0.024(2)        | 0.000(2)        | 0.002(2)        | -0.000(2)       |
| C(9)  | 0.018(2)        | 0.021(2)        | 0.025(2)        | -0.007(2)       | 0.006(2)        | 0.002(2)        |
| C(10) | 0.018(2)        | 0.022(2)        | 0.026(2)        | -0.000(2)       | -0.003(2)       | -0.006(2)       |
| C(11) | 0.012(2)        | 0.024(2)        | 0.031(3)        | 0.000(2)        | 0.001(2)        | -0.011(2)       |
| C(12) | 0.022(2)        | 0.015(2)        | 0.020(2)        | -0.002(2)       | 0.002(2)        | 0.002(2)        |
| C(13) | 0.023(2)        | 0.018(2)        | 0.030(3)        | -0.005(2)       | -0.000(2)       | 0.000(2)        |
| C(14) | 0.020(2)        | 0.025(3)        | 0.034(3)        | 0.004(2)        | 0.003(2)        | -0.002(2)       |
| C(15) | 0.037(3)        | 0.022(3)        | 0.039(3)        | -0.001(2)       | 0.004(2)        | -0.009(2)       |
| C(16) | 0.036(3)        | 0.025(3)        | 0.031(3)        | -0.006(2)       | -0.008(2)       | -0.008(2)       |
| C(17) | 0.024(2)        | 0.018(2)        | 0.021(2)        | 0.000(2)        | -0.004(2)       | -0.000(2)       |
| C(18) | 0.019(2)        | 0.016(2)        | 0.023(2)        | -0.002(2)       | 0.001(2)        | -0.003(2)       |
| C(19) | 0.019(2)        | 0.024(2)        | 0.021(2)        | -0.001(2)       | -0.002(2)       | 0.001(2)        |
| C(20) | 0.018(2)        | 0.033(3)        | 0.033(3)        | -0.011(2)       | -0.004(2)       | -0.002(2)       |
| C(21) | 0.022(2)        | 0.036(3)        | 0.034(3)        | -0.010(2)       | -0.007(2)       | -0.006(2)       |
| C(22) | 0.031(3)        | 0.026(3)        | 0.025(3)        | -0.003(2)       | -0.006(2)       | -0.002(2)       |
| C(23) | 0.018(2)        | 0.016(2)        | 0.023(2)        | -0.001(2)       | -0.000(2)       | 0.000(2)        |
| C(24) | 0.022(2)        | 0.020(2)        | 0.027(2)        | -0.009(2)       | -0.003(2)       | -0.001(2)       |
| C(25) | 0.020(2)        | 0.025(2)        | 0.030(3)        | -0.004(2)       | -0.001(2)       | -0.002(2)       |
| C(26) | 0.032(3)        | 0.034(3)        | 0.031(3)        | -0.005(2)       | -0.006(2)       | -0.009(2)       |
| C(27) | 0.029(3)        | 0.048(4)        | 0.043(3)        | -0.017(2)       | -0.004(2)       | -0.013(3)       |
| C(28) | 0.021(2)        | 0.049(4)        | 0.051(4)        | -0.015(2)       | 0.001(2)        | -0.020(3)       |
| C(29) | 0.023(2)        | 0.042(3)        | 0.033(3)        | -0.016(2)       | 0.003(2)        | -0.012(2)       |
| C(30) | 0.017(2)        | 0.031(3)        | 0.025(2)        | -0.011(2)       | -0.001(2)       | -0.004(2)       |
| C(31) | 0.018(2)        | 0.036(3)        | 0.033(3)        | -0.005(2)       | -0.003(2)       | -0.004(2)       |
| C(32) | 0.032(3)        | 0.046(3)        | 0.023(3)        | -0.013(2)       | 0.004(2)        | -0.006(2)       |
| C(33) | 0.023(3)        | 0.046(3)        | 0.041(3)        | -0.010(2)       | 0.011(2)        | -0.022(3)       |
| C(34) | 0.020(2)        | 0.030(3)        | 0.036(3)        | -0.003(2)       | 0.001(2)        | 0.001(2)        |
| C(35) | 0.020(2)        | 0.026(3)        | 0.029(3)        | -0.003(2)       | 0.003(2)        | -0.007(2)       |
| C(36) | 0.013(2)        | 0.024(2)        | 0.019(2)        | -0.001(2)       | -0.005(2)       | 0.003(2)        |

Table 3. Anisotropic displacement parameters (continued)

| atom  | U <sub>11</sub> | U <sub>22</sub> | U <sub>33</sub> | U <sub>12</sub> | U <sub>13</sub> | U <sub>23</sub> |
|-------|-----------------|-----------------|-----------------|-----------------|-----------------|-----------------|
| C(37) | 0.023(2)        | 0.024(2)        | 0.028(3)        | 0.003(2)        | 0.000(2)        | -0.005(2)       |
| C(38) | 0.018(2)        | 0.046(3)        | 0.030(3)        | 0.006(2)        | -0.000(2)       | -0.002(2)       |
| C(39) | 0.017(2)        | 0.047(3)        | 0.030(3)        | -0.007(2)       | -0.003(2)       | -0.001(2)       |
| C(40) | 0.029(3)        | 0.033(3)        | 0.026(3)        | -0.012(2)       | -0.005(2)       | -0.002(2)       |
| C(41) | 0.017(2)        | 0.030(3)        | 0.026(2)        | -0.002(2)       | -0.004(2)       | 0.000(2)        |
| C(42) | 0.021(2)        | 0.020(2)        | 0.022(2)        | -0.003(2)       | -0.002(2)       | -0.004(2)       |
| C(43) | 0.017(2)        | 0.035(3)        | 0.030(3)        | -0.006(2)       | -0.003(2)       | -0.006(2)       |
| C(44) | 0.027(3)        | 0.029(3)        | 0.027(3)        | -0.004(2)       | -0.010(2)       | 0.002(2)        |
| C(45) | 0.032(3)        | 0.029(3)        | 0.014(2)        | -0.005(2)       | -0.006(2)       | -0.001(2)       |
| C(46) | 0.022(2)        | 0.019(2)        | 0.025(2)        | -0.005(2)       | 0.006(2)        | -0.001(2)       |
| C(47) | 0.015(2)        | 0.016(2)        | 0.026(2)        | -0.004(2)       | 0.003(2)        | -0.004(2)       |
| C(48) | 0.020(2)        | 0.024(2)        | 0.020(2)        | -0.008(2)       | 0.003(2)        | -0.006(2)       |
| C(49) | 0.024(2)        | 0.023(2)        | 0.022(2)        | -0.003(2)       | 0.001(2)        | -0.002(2)       |
| C(50) | 0.026(2)        | 0.039(3)        | 0.029(3)        | -0.013(2)       | -0.000(2)       | -0.007(2)       |
| C(51) | 0.040(3)        | 0.041(3)        | 0.029(3)        | -0.022(2)       | 0.003(2)        | -0.012(2)       |
| C(52) | 0.039(3)        | 0.026(3)        | 0.035(3)        | -0.012(2)       | -0.002(2)       | -0.005(2)       |
| C(53) | 0.026(2)        | 0.023(2)        | 0.024(2)        | -0.002(2)       | 0.002(2)        | -0.004(2)       |
| C(54) | 0.017(2)        | 0.020(2)        | 0.024(2)        | -0.005(2)       | -0.002(2)       | -0.003(2)       |
| C(55) | 0.024(2)        | 0.024(2)        | 0.030(3)        | -0.003(2)       | 0.004(2)        | -0.007(2)       |
| C(56) | 0.026(2)        | 0.029(3)        | 0.029(3)        | -0.004(2)       | -0.006(2)       | 0.004(2)        |
| C(57) | 0.030(3)        | 0.050(3)        | 0.019(2)        | -0.009(2)       | 0.002(2)        | -0.007(2)       |
| C(58) | 0.025(3)        | 0.059(4)        | 0.027(3)        | 0.005(2)        | 0.007(2)        | -0.017(3)       |
| C(59) | 0.020(2)        | 0.036(3)        | 0.026(3)        | 0.008(2)        | 0.001(2)        | -0.005(2)       |
| C(60) | 0.017(2)        | 0.024(2)        | 0.019(2)        | -0.006(2)       | 0.007(2)        | -0.004(2)       |
| C(61) | 0.030(3)        | 0.025(3)        | 0.025(3)        | -0.003(2)       | -0.004(2)       | -0.001(2)       |
| C(62) | 0.043(3)        | 0.027(3)        | 0.029(3)        | -0.008(2)       | 0.002(2)        | -0.003(2)       |
| C(63) | 0.035(3)        | 0.030(3)        | 0.034(3)        | -0.015(2)       | 0.008(2)        | -0.014(2)       |
| C(64) | 0.023(2)        | 0.036(3)        | 0.036(3)        | -0.011(2)       | 0.004(2)        | -0.013(2)       |
| C(65) | 0.023(2)        | 0.025(3)        | 0.023(2)        | -0.002(2)       | 0.001(2)        | -0.000(2)       |
| C(66) | 0.015(2)        | 0.028(3)        | 0.020(2)        | -0.004(2)       | -0.003(2)       | -0.007(2)       |
| C(67) | 0.015(2)        | 0.023(2)        | 0.025(2)        | -0.002(2)       | 0.004(2)        | 0.001(2)        |
| C(68) | 0.027(2)        | 0.023(2)        | 0.029(3)        | 0.005(2)        | -0.001(2)       | -0.000(2)       |
| C(69) | 0.016(2)        | 0.035(3)        | 0.024(2)        | 0.007(2)        | -0.000(2)       | -0.006(2)       |
| C(70) | 0.019(2)        | 0.029(3)        | 0.026(3)        | 0.002(2)        | 0.002(2)        | 0.002(2)        |
| C(71) | 0.018(2)        | 0.028(3)        | 0.025(3)        | -0.003(2)       | -0.000(2)       | 0.001(2)        |
| C(72) | 0.040(3)        | 0.033(3)        | 0.053(4)        | 0.002(2)        | 0.005(3)        | -0.008(3)       |
| C(73) | 0.045(3)        | 0.044(4)        | 0.046(4)        | -0.008(3)       | 0.008(3)        | -0.007(3)       |



Table 3. Anisotropic displacement parameters (continued)

| atom  | U <sub>11</sub> | U <sub>22</sub> | U <sub>33</sub> | U <sub>12</sub> | U <sub>13</sub> | U <sub>23</sub> |
|-------|-----------------|-----------------|-----------------|-----------------|-----------------|-----------------|
| C(74) | 0.057(4)        | 0.056(4)        | 0.043(4)        | -0.011(3)       | 0.001(3)        | -0.005(3)       |
| C(75) | 0.066(5)        | 0.046(4)        | 0.058(4)        | -0.001(3)       | -0.008(4)       | -0.015(3)       |
| C(76) | 0.063(5)        | 0.052(4)        | 0.058(4)        | -0.003(3)       | 0.014(4)        | -0.017(3)       |
| C(77) | 0.053(4)        | 0.055(4)        | 0.046(4)        | 0.002(3)        | 0.012(3)        | -0.013(3)       |
| C(78) | 0.051(4)        | 0.062(5)        | 0.068(5)        | 0.005(3)        | -0.016(4)       | -0.016(4)       |

The general temperature factor expression:  $\exp(-2\pi^2(a^2U_{11}h^2 + b^2U_{22}k^2 + c^2U_{33}l^2 + 2a*b*U_{12}hk + 2a*c*U_{13}hl + 2b*c*U_{23}kl))$

Table 4. Bond lengths (Å)

| atom  | atom  | distance   | atom  | atom  | distance   |
|-------|-------|------------|-------|-------|------------|
| Mo(1) | P(1)  | 2.4559(12) | Mo(1) | P(2)  | 2.5297(13) |
| Mo(1) | P(3)  | 2.4364(13) | Mo(1) | P(4)  | 2.5120(15) |
| Mo(1) | Si(1) | 2.5536(13) | Mo(1) | C(1)  | 1.996(5)   |
| P(1)  | C(8)  | 1.855(4)   | P(1)  | C(12) | 1.855(5)   |
| P(1)  | C(18) | 1.836(5)   | P(2)  | C(9)  | 1.864(4)   |
| P(2)  | C(24) | 1.847(5)   | P(2)  | C(30) | 1.845(5)   |
| P(3)  | C(10) | 1.833(5)   | P(3)  | C(36) | 1.851(4)   |
| P(3)  | C(42) | 1.818(4)   | P(4)  | C(11) | 1.848(4)   |
| P(4)  | C(48) | 1.850(5)   | P(4)  | C(54) | 1.848(5)   |
| Si(1) | C(47) | 1.905(5)   | Si(1) | C(60) | 1.920(5)   |
| Si(1) | C(66) | 1.898(5)   | N(1)  | C(1)  | 1.204(7)   |
| N(1)  | C(2A) | 1.423(14)  | N(1)  | C(2B) | 1.484(12)  |
| C(2A) | C(3A) | 1.495(16)  | C(2A) | C(7A) | 1.52(2)    |
| C(2B) | C(3B) | 1.530(18)  | C(2B) | C(7B) | 1.530(17)  |
| C(3A) | C(4A) | 1.55(2)    | C(3B) | C(4B) | 1.46(2)    |
| C(4A) | C(5A) | 1.512(17)  | C(4B) | C(5B) | 1.58(2)    |
| C(5A) | C(6A) | 1.505(17)  | C(5B) | C(6B) | 1.53(2)    |
| C(6A) | C(7A) | 1.61(2)    | C(6B) | C(7B) | 1.43(2)    |
| C(8)  | C(9)  | 1.521(7)   | C(10) | C(11) | 1.529(7)   |
| C(12) | C(13) | 1.398(7)   | C(12) | C(17) | 1.393(8)   |
| C(13) | C(14) | 1.387(7)   | C(14) | C(15) | 1.370(9)   |
| C(15) | C(16) | 1.374(8)   | C(16) | C(17) | 1.392(7)   |
| C(18) | C(19) | 1.402(6)   | C(18) | C(23) | 1.387(7)   |
| C(19) | C(20) | 1.386(8)   | C(20) | C(21) | 1.370(8)   |
| C(21) | C(22) | 1.389(7)   | C(22) | C(23) | 1.382(8)   |
| C(24) | C(25) | 1.396(8)   | C(24) | C(29) | 1.397(7)   |
| C(25) | C(26) | 1.382(8)   | C(26) | C(27) | 1.386(7)   |
| C(27) | C(28) | 1.367(9)   | C(28) | C(29) | 1.395(9)   |
| C(30) | C(31) | 1.394(7)   | C(30) | C(35) | 1.393(7)   |
| C(31) | C(32) | 1.387(8)   | C(32) | C(33) | 1.382(8)   |
| C(33) | C(34) | 1.392(8)   | C(34) | C(35) | 1.371(7)   |
| C(36) | C(37) | 1.388(7)   | C(36) | C(41) | 1.393(8)   |
| C(37) | C(38) | 1.399(7)   | C(38) | C(39) | 1.377(9)   |
| C(39) | C(40) | 1.369(8)   | C(40) | C(41) | 1.391(7)   |
| C(42) | C(43) | 1.405(7)   | C(42) | C(47) | 1.408(6)   |
| C(43) | C(44) | 1.382(7)   | C(44) | C(45) | 1.377(7)   |
| C(45) | C(46) | 1.376(7)   | C(46) | C(47) | 1.410(6)   |

Table 4. Bond lengths (Å) (continued)

| atom  | atom  | distance  | atom  | atom  | distance  |
|-------|-------|-----------|-------|-------|-----------|
| C(48) | C(49) | 1.400(7)  | C(48) | C(53) | 1.390(7)  |
| C(49) | C(50) | 1.383(8)  | C(50) | C(51) | 1.378(8)  |
| C(51) | C(52) | 1.377(8)  | C(52) | C(53) | 1.391(8)  |
| C(54) | C(55) | 1.396(6)  | C(54) | C(59) | 1.394(7)  |
| C(55) | C(56) | 1.372(7)  | C(56) | C(57) | 1.380(8)  |
| C(57) | C(58) | 1.370(8)  | C(58) | C(59) | 1.391(7)  |
| C(60) | C(61) | 1.390(6)  | C(60) | C(65) | 1.401(7)  |
| C(61) | C(62) | 1.399(8)  | C(62) | C(63) | 1.375(8)  |
| C(63) | C(64) | 1.390(7)  | C(64) | C(65) | 1.380(8)  |
| C(66) | C(67) | 1.398(7)  | C(66) | C(71) | 1.405(6)  |
| C(67) | C(68) | 1.385(7)  | C(68) | C(69) | 1.386(6)  |
| C(69) | C(70) | 1.374(7)  | C(70) | C(71) | 1.386(7)  |
| C(72) | C(73) | 1.383(8)  | C(72) | C(77) | 1.381(10) |
| C(72) | C(78) | 1.484(11) | C(73) | C(74) | 1.394(11) |
| C(74) | C(75) | 1.376(10) | C(75) | C(76) | 1.370(10) |
| C(76) | C(77) | 1.386(11) |       |       |           |

Table 5. Bond lengths involving hydrogens (Å)

| atom  | atom   | distance | atom  | atom   | distance |
|-------|--------|----------|-------|--------|----------|
| C(2A) | H(1A)  | 1.000    | C(2B) | H(1B)  | 1.000    |
| C(3A) | H(2A)  | 0.990    | C(3A) | H(3A)  | 0.990    |
| C(3B) | H(2B)  | 0.990    | C(3B) | H(3B)  | 0.990    |
| C(4A) | H(4A)  | 0.990    | C(4A) | H(5A)  | 0.990    |
| C(4B) | H(4B)  | 0.990    | C(4B) | H(5B)  | 0.990    |
| C(5A) | H(6A)  | 0.990    | C(5A) | H(7A)  | 0.990    |
| C(5B) | H(6B)  | 0.990    | C(5B) | H(7B)  | 0.990    |
| C(6A) | H(8A)  | 0.990    | C(6A) | H(9A)  | 0.990    |
| C(6B) | H(8B)  | 0.990    | C(6B) | H(9B)  | 0.990    |
| C(7A) | H(10A) | 0.990    | C(7A) | H(11A) | 0.990    |
| C(7B) | H(10B) | 0.990    | C(7B) | H(11B) | 0.990    |
| C(8)  | H(12)  | 0.990    | C(8)  | H(13)  | 0.990    |
| C(9)  | H(14)  | 0.990    | C(9)  | H(15)  | 0.990    |
| C(10) | H(16)  | 0.990    | C(10) | H(17)  | 0.990    |
| C(11) | H(18)  | 0.990    | C(11) | H(19)  | 0.990    |
| C(13) | H(20)  | 0.950    | C(14) | H(21)  | 0.950    |
| C(15) | H(22)  | 0.950    | C(16) | H(23)  | 0.950    |
| C(17) | H(24)  | 0.950    | C(19) | H(25)  | 0.950    |
| C(20) | H(26)  | 0.950    | C(21) | H(27)  | 0.950    |
| C(22) | H(28)  | 0.950    | C(23) | H(29)  | 0.950    |
| C(25) | H(30)  | 0.950    | C(26) | H(31)  | 0.950    |
| C(27) | H(32)  | 0.950    | C(28) | H(33)  | 0.950    |
| C(29) | H(34)  | 0.950    | C(31) | H(35)  | 0.950    |
| C(32) | H(36)  | 0.950    | C(33) | H(37)  | 0.950    |
| C(34) | H(38)  | 0.950    | C(35) | H(39)  | 0.950    |
| C(37) | H(40)  | 0.950    | C(38) | H(41)  | 0.950    |
| C(39) | H(42)  | 0.950    | C(40) | H(43)  | 0.950    |
| C(41) | H(44)  | 0.950    | C(43) | H(45)  | 0.950    |
| C(44) | H(46)  | 0.950    | C(45) | H(47)  | 0.950    |
| C(46) | H(48)  | 0.950    | C(49) | H(49)  | 0.950    |
| C(50) | H(50)  | 0.950    | C(51) | H(51)  | 0.950    |
| C(52) | H(52)  | 0.950    | C(53) | H(53)  | 0.950    |
| C(55) | H(54)  | 0.950    | C(56) | H(55)  | 0.950    |
| C(57) | H(56)  | 0.950    | C(58) | H(57)  | 0.950    |
| C(59) | H(58)  | 0.950    | C(61) | H(59)  | 0.950    |
| C(62) | H(60)  | 0.950    | C(63) | H(61)  | 0.950    |
| C(64) | H(62)  | 0.950    | C(65) | H(63)  | 0.950    |

Table 5. Bond lengths involving hydrogens (Å) (continued)

| atom  | atom  | distance | atom  | atom  | distance |
|-------|-------|----------|-------|-------|----------|
| C(67) | H(64) | 0.950    | C(68) | H(65) | 0.950    |
| C(69) | H(66) | 0.950    | C(70) | H(67) | 0.950    |
| C(71) | H(68) | 0.950    | C(73) | H(69) | 0.950    |
| C(74) | H(70) | 0.950    | C(75) | H(71) | 0.950    |
| C(76) | H(72) | 0.950    | C(77) | H(73) | 0.950    |
| C(78) | H(74) | 0.980    | C(78) | H(75) | 0.980    |
| C(78) | H(76) | 0.980    |       |       |          |

Table 6. Bond angles (°)

| atom  | atom  | atom  | angle      | atom  | atom  | atom  | angle      |
|-------|-------|-------|------------|-------|-------|-------|------------|
| P(1)  | Mo(1) | P(2)  | 79.45(4)   | P(1)  | Mo(1) | P(3)  | 175.37(4)  |
| P(1)  | Mo(1) | P(4)  | 101.40(4)  | P(1)  | Mo(1) | Si(1) | 109.78(4)  |
| P(1)  | Mo(1) | C(1)  | 93.15(14)  | P(2)  | Mo(1) | P(3)  | 95.95(4)   |
| P(2)  | Mo(1) | P(4)  | 94.14(4)   | P(2)  | Mo(1) | Si(1) | 162.45(5)  |
| P(2)  | Mo(1) | C(1)  | 92.49(14)  | P(3)  | Mo(1) | P(4)  | 79.31(4)   |
| P(3)  | Mo(1) | Si(1) | 74.53(4)   | P(3)  | Mo(1) | C(1)  | 86.50(14)  |
| P(4)  | Mo(1) | Si(1) | 98.41(4)   | P(4)  | Mo(1) | C(1)  | 164.88(14) |
| Si(1) | Mo(1) | C(1)  | 72.53(14)  | Mo(1) | P(1)  | C(8)  | 110.69(15) |
| Mo(1) | P(1)  | C(12) | 121.39(16) | Mo(1) | P(1)  | C(18) | 120.88(15) |
| C(8)  | P(1)  | C(12) | 99.0(2)    | C(8)  | P(1)  | C(18) | 103.1(2)   |
| C(12) | P(1)  | C(18) | 98.3(2)    | Mo(1) | P(2)  | C(9)  | 108.09(15) |
| Mo(1) | P(2)  | C(24) | 124.44(16) | Mo(1) | P(2)  | C(30) | 120.18(18) |
| C(9)  | P(2)  | C(24) | 96.9(2)    | C(9)  | P(2)  | C(30) | 102.9(2)   |
| C(24) | P(2)  | C(30) | 100.3(2)   | Mo(1) | P(3)  | C(10) | 110.40(17) |
| Mo(1) | P(3)  | C(36) | 124.08(15) | Mo(1) | P(3)  | C(42) | 114.61(16) |
| C(10) | P(3)  | C(36) | 102.3(2)   | C(10) | P(3)  | C(42) | 103.1(2)   |
| C(36) | P(3)  | C(42) | 99.8(2)    | Mo(1) | P(4)  | C(11) | 107.85(19) |
| Mo(1) | P(4)  | C(48) | 121.82(17) | Mo(1) | P(4)  | C(54) | 126.23(17) |
| C(11) | P(4)  | C(48) | 101.7(2)   | C(11) | P(4)  | C(54) | 101.0(2)   |
| C(48) | P(4)  | C(54) | 94.2(2)    | Mo(1) | Si(1) | C(47) | 106.64(14) |
| Mo(1) | Si(1) | C(60) | 123.41(16) | Mo(1) | Si(1) | C(66) | 118.81(15) |
| C(47) | Si(1) | C(60) | 99.8(2)    | C(47) | Si(1) | C(66) | 105.8(2)   |
| C(60) | Si(1) | C(66) | 99.8(2)    | C(1)  | N(1)  | C(2A) | 178.5(6)   |
| C(1)  | N(1)  | C(2B) | 145.7(6)   | Mo(1) | C(1)  | N(1)  | 176.2(4)   |
| N(1)  | C(2A) | C(3A) | 110.9(10)  | N(1)  | C(2A) | C(7A) | 106.3(10)  |
| C(3A) | C(2A) | C(7A) | 110.2(10)  | N(1)  | C(2B) | C(3B) | 109.4(8)   |
| N(1)  | C(2B) | C(7B) | 112.2(8)   | C(3B) | C(2B) | C(7B) | 111.7(11)  |
| C(2A) | C(3A) | C(4A) | 110.5(11)  | C(2B) | C(3B) | C(4B) | 111.2(10)  |
| C(3A) | C(4A) | C(5A) | 108.6(10)  | C(3B) | C(4B) | C(5B) | 110.2(12)  |
| C(4A) | C(5A) | C(6A) | 115.8(10)  | C(4B) | C(5B) | C(6B) | 105.5(16)  |
| C(5A) | C(6A) | C(7A) | 107.8(12)  | C(5B) | C(6B) | C(7B) | 111.7(14)  |
| C(2A) | C(7A) | C(6A) | 109.3(13)  | C(2B) | C(7B) | C(6B) | 107.3(11)  |
| P(1)  | C(8)  | C(9)  | 109.3(3)   | P(2)  | C(9)  | C(8)  | 111.0(3)   |
| P(3)  | C(10) | C(11) | 108.3(3)   | P(4)  | C(11) | C(10) | 109.6(3)   |
| P(1)  | C(12) | C(13) | 123.0(4)   | P(1)  | C(12) | C(17) | 119.9(3)   |
| C(13) | C(12) | C(17) | 117.1(4)   | C(12) | C(13) | C(14) | 121.0(5)   |
| C(13) | C(14) | C(15) | 121.2(5)   | C(14) | C(15) | C(16) | 118.8(5)   |

Table 6. Bond angles (°) (continued)

| atom  | atom  | atom  | angle    | atom  | atom  | atom  | angle    |
|-------|-------|-------|----------|-------|-------|-------|----------|
| C(15) | C(16) | C(17) | 120.8(5) | C(12) | C(17) | C(16) | 121.2(4) |
| P(1)  | C(18) | C(19) | 118.4(3) | P(1)  | C(18) | C(23) | 123.4(3) |
| C(19) | C(18) | C(23) | 118.2(4) | C(18) | C(19) | C(20) | 120.7(4) |
| C(19) | C(20) | C(21) | 120.4(4) | C(20) | C(21) | C(22) | 119.5(5) |
| C(21) | C(22) | C(23) | 120.4(5) | C(18) | C(23) | C(22) | 120.7(4) |
| P(2)  | C(24) | C(25) | 118.6(3) | P(2)  | C(24) | C(29) | 123.7(4) |
| C(25) | C(24) | C(29) | 117.7(5) | C(24) | C(25) | C(26) | 121.8(4) |
| C(25) | C(26) | C(27) | 119.5(5) | C(26) | C(27) | C(28) | 119.8(6) |
| C(27) | C(28) | C(29) | 121.0(5) | C(24) | C(29) | C(28) | 120.1(5) |
| P(2)  | C(30) | C(31) | 123.5(3) | P(2)  | C(30) | C(35) | 118.2(3) |
| C(31) | C(30) | C(35) | 118.3(4) | C(30) | C(31) | C(32) | 120.3(4) |
| C(31) | C(32) | C(33) | 120.5(5) | C(32) | C(33) | C(34) | 119.6(5) |
| C(33) | C(34) | C(35) | 119.8(5) | C(30) | C(35) | C(34) | 121.5(4) |
| P(3)  | C(36) | C(37) | 124.3(4) | P(3)  | C(36) | C(41) | 117.1(3) |
| C(37) | C(36) | C(41) | 118.6(4) | C(36) | C(37) | C(38) | 120.3(5) |
| C(37) | C(38) | C(39) | 120.3(5) | C(38) | C(39) | C(40) | 119.7(5) |
| C(39) | C(40) | C(41) | 120.8(5) | C(36) | C(41) | C(40) | 120.3(4) |
| P(3)  | C(42) | C(43) | 124.7(3) | P(3)  | C(42) | C(47) | 115.0(3) |
| C(43) | C(42) | C(47) | 120.3(4) | C(42) | C(43) | C(44) | 120.3(4) |
| C(43) | C(44) | C(45) | 119.8(4) | C(44) | C(45) | C(46) | 120.7(4) |
| C(45) | C(46) | C(47) | 121.4(4) | Si(1) | C(47) | C(42) | 115.9(3) |
| Si(1) | C(47) | C(46) | 126.2(3) | C(42) | C(47) | C(46) | 117.4(4) |
| P(4)  | C(48) | C(49) | 118.5(3) | P(4)  | C(48) | C(53) | 123.7(3) |
| C(49) | C(48) | C(53) | 117.7(5) | C(48) | C(49) | C(50) | 120.8(4) |
| C(49) | C(50) | C(51) | 120.9(5) | C(50) | C(51) | C(52) | 119.0(5) |
| C(51) | C(52) | C(53) | 120.7(5) | C(48) | C(53) | C(52) | 120.9(4) |
| P(4)  | C(54) | C(55) | 117.9(3) | P(4)  | C(54) | C(59) | 124.4(3) |
| C(55) | C(54) | C(59) | 117.2(4) | C(54) | C(55) | C(56) | 121.3(5) |
| C(55) | C(56) | C(57) | 120.7(4) | C(56) | C(57) | C(58) | 119.2(5) |
| C(57) | C(58) | C(59) | 120.4(5) | C(54) | C(59) | C(58) | 121.0(4) |
| Si(1) | C(60) | C(61) | 122.6(4) | Si(1) | C(60) | C(65) | 120.5(3) |
| C(61) | C(60) | C(65) | 116.7(4) | C(60) | C(61) | C(62) | 121.7(5) |
| C(61) | C(62) | C(63) | 120.0(5) | C(62) | C(63) | C(64) | 119.5(5) |
| C(63) | C(64) | C(65) | 119.9(5) | C(60) | C(65) | C(64) | 122.1(4) |
| Si(1) | C(66) | C(67) | 123.2(3) | Si(1) | C(66) | C(71) | 121.1(3) |
| C(67) | C(66) | C(71) | 115.8(4) | C(66) | C(67) | C(68) | 122.8(4) |
| C(67) | C(68) | C(69) | 119.6(4) | C(68) | C(69) | C(70) | 119.5(4) |

Table 6. Bond angles ( $^{\circ}$ ) (continued)

| atom  | atom  | atom  | angle    | atom  | atom  | atom  | angle    |
|-------|-------|-------|----------|-------|-------|-------|----------|
| C(69) | C(70) | C(71) | 120.5(4) | C(66) | C(71) | C(70) | 121.9(4) |
| C(73) | C(72) | C(77) | 117.7(6) | C(73) | C(72) | C(78) | 121.8(6) |
| C(77) | C(72) | C(78) | 120.5(6) | C(72) | C(73) | C(74) | 121.5(6) |
| C(73) | C(74) | C(75) | 119.1(6) | C(74) | C(75) | C(76) | 120.5(7) |
| C(75) | C(76) | C(77) | 119.6(7) | C(72) | C(77) | C(76) | 121.6(6) |



Table 7. Bond angles involving hydrogens ( $^{\circ}$ )

| atom   | atom  | atom   | angle | atom   | atom  | atom   | angle |
|--------|-------|--------|-------|--------|-------|--------|-------|
| N(1)   | C(2A) | H(1A)  | 109.8 | C(3A)  | C(2A) | H(1A)  | 109.8 |
| C(7A)  | C(2A) | H(1A)  | 109.8 | N(1)   | C(2B) | H(1B)  | 107.8 |
| C(3B)  | C(2B) | H(1B)  | 107.8 | C(7B)  | C(2B) | H(1B)  | 107.8 |
| C(2A)  | C(3A) | H(2A)  | 109.6 | C(2A)  | C(3A) | H(3A)  | 109.6 |
| C(4A)  | C(3A) | H(2A)  | 109.6 | C(4A)  | C(3A) | H(3A)  | 109.6 |
| H(2A)  | C(3A) | H(3A)  | 108.1 | C(2B)  | C(3B) | H(2B)  | 109.4 |
| C(2B)  | C(3B) | H(3B)  | 109.4 | C(4B)  | C(3B) | H(2B)  | 109.4 |
| C(4B)  | C(3B) | H(3B)  | 109.4 | H(2B)  | C(3B) | H(3B)  | 108.0 |
| C(3A)  | C(4A) | H(4A)  | 110.0 | C(3A)  | C(4A) | H(5A)  | 110.0 |
| C(5A)  | C(4A) | H(4A)  | 110.0 | C(5A)  | C(4A) | H(5A)  | 110.0 |
| H(4A)  | C(4A) | H(5A)  | 108.4 | C(3B)  | C(4B) | H(4B)  | 109.6 |
| C(3B)  | C(4B) | H(5B)  | 109.6 | C(5B)  | C(4B) | H(4B)  | 109.6 |
| C(5B)  | C(4B) | H(5B)  | 109.6 | H(4B)  | C(4B) | H(5B)  | 108.1 |
| C(4A)  | C(5A) | H(6A)  | 108.3 | C(4A)  | C(5A) | H(7A)  | 108.3 |
| C(6A)  | C(5A) | H(6A)  | 108.3 | C(6A)  | C(5A) | H(7A)  | 108.3 |
| H(6A)  | C(5A) | H(7A)  | 107.4 | C(4B)  | C(5B) | H(6B)  | 110.6 |
| C(4B)  | C(5B) | H(7B)  | 110.6 | C(6B)  | C(5B) | H(6B)  | 110.6 |
| C(6B)  | C(5B) | H(7B)  | 110.6 | H(6B)  | C(5B) | H(7B)  | 108.7 |
| C(5A)  | C(6A) | H(8A)  | 110.2 | C(5A)  | C(6A) | H(9A)  | 110.2 |
| C(7A)  | C(6A) | H(8A)  | 110.2 | C(7A)  | C(6A) | H(9A)  | 110.2 |
| H(8A)  | C(6A) | H(9A)  | 108.5 | C(5B)  | C(6B) | H(8B)  | 109.3 |
| C(5B)  | C(6B) | H(9B)  | 109.3 | C(7B)  | C(6B) | H(8B)  | 109.3 |
| C(7B)  | C(6B) | H(9B)  | 109.3 | H(8B)  | C(6B) | H(9B)  | 108.0 |
| C(2A)  | C(7A) | H(10A) | 109.8 | C(2A)  | C(7A) | H(11A) | 109.8 |
| C(6A)  | C(7A) | H(10A) | 109.8 | C(6A)  | C(7A) | H(11A) | 109.8 |
| H(10A) | C(7A) | H(11A) | 108.3 | C(2B)  | C(7B) | H(10B) | 110.3 |
| C(2B)  | C(7B) | H(11B) | 110.3 | C(6B)  | C(7B) | H(10B) | 110.3 |
| C(6B)  | C(7B) | H(11B) | 110.3 | H(10B) | C(7B) | H(11B) | 108.5 |
| P(1)   | C(8)  | H(12)  | 109.8 | P(1)   | C(8)  | H(13)  | 109.8 |
| C(9)   | C(8)  | H(12)  | 109.8 | C(9)   | C(8)  | H(13)  | 109.8 |
| H(12)  | C(8)  | H(13)  | 108.3 | P(2)   | C(9)  | H(14)  | 109.4 |
| P(2)   | C(9)  | H(15)  | 109.4 | C(8)   | C(9)  | H(14)  | 109.4 |
| C(8)   | C(9)  | H(15)  | 109.4 | H(14)  | C(9)  | H(15)  | 108.0 |
| P(3)   | C(10) | H(16)  | 110.0 | P(3)   | C(10) | H(17)  | 110.0 |
| C(11)  | C(10) | H(16)  | 110.0 | C(11)  | C(10) | H(17)  | 110.0 |
| H(16)  | C(10) | H(17)  | 108.4 | P(4)   | C(11) | H(18)  | 109.8 |
| P(4)   | C(11) | H(19)  | 109.8 | C(10)  | C(11) | H(18)  | 109.7 |

Table 7. Bond angles involving hydrogens (<sup>o</sup>) (continued)

| atom  | atom  | atom  | angle | atom  | atom  | atom  | angle |
|-------|-------|-------|-------|-------|-------|-------|-------|
| C(10) | C(11) | H(19) | 109.7 | H(18) | C(11) | H(19) | 108.2 |
| C(12) | C(13) | H(20) | 119.5 | C(14) | C(13) | H(20) | 119.5 |
| C(13) | C(14) | H(21) | 119.4 | C(15) | C(14) | H(21) | 119.4 |
| C(14) | C(15) | H(22) | 120.6 | C(16) | C(15) | H(22) | 120.6 |
| C(15) | C(16) | H(23) | 119.6 | C(17) | C(16) | H(23) | 119.6 |
| C(12) | C(17) | H(24) | 119.4 | C(16) | C(17) | H(24) | 119.4 |
| C(18) | C(19) | H(25) | 119.7 | C(20) | C(19) | H(25) | 119.7 |
| C(19) | C(20) | H(26) | 119.8 | C(21) | C(20) | H(26) | 119.8 |
| C(20) | C(21) | H(27) | 120.3 | C(22) | C(21) | H(27) | 120.2 |
| C(21) | C(22) | H(28) | 119.8 | C(23) | C(22) | H(28) | 119.8 |
| C(18) | C(23) | H(29) | 119.7 | C(22) | C(23) | H(29) | 119.7 |
| C(24) | C(25) | H(30) | 119.1 | C(26) | C(25) | H(30) | 119.1 |
| C(25) | C(26) | H(31) | 120.2 | C(27) | C(26) | H(31) | 120.2 |
| C(26) | C(27) | H(32) | 120.1 | C(28) | C(27) | H(32) | 120.1 |
| C(27) | C(28) | H(33) | 119.5 | C(29) | C(28) | H(33) | 119.5 |
| C(24) | C(29) | H(34) | 119.9 | C(28) | C(29) | H(34) | 119.9 |
| C(30) | C(31) | H(35) | 119.8 | C(32) | C(31) | H(35) | 119.8 |
| C(31) | C(32) | H(36) | 119.8 | C(33) | C(32) | H(36) | 119.8 |
| C(32) | C(33) | H(37) | 120.2 | C(34) | C(33) | H(37) | 120.2 |
| C(33) | C(34) | H(38) | 120.1 | C(35) | C(34) | H(38) | 120.1 |
| C(30) | C(35) | H(39) | 119.2 | C(34) | C(35) | H(39) | 119.2 |
| C(36) | C(37) | H(40) | 119.9 | C(38) | C(37) | H(40) | 119.9 |
| C(37) | C(38) | H(41) | 119.8 | C(39) | C(38) | H(41) | 119.8 |
| C(38) | C(39) | H(42) | 120.2 | C(40) | C(39) | H(42) | 120.2 |
| C(39) | C(40) | H(43) | 119.6 | C(41) | C(40) | H(43) | 119.6 |
| C(36) | C(41) | H(44) | 119.8 | C(40) | C(41) | H(44) | 119.8 |
| C(42) | C(43) | H(45) | 119.9 | C(44) | C(43) | H(45) | 119.8 |
| C(43) | C(44) | H(46) | 120.1 | C(45) | C(44) | H(46) | 120.1 |
| C(44) | C(45) | H(47) | 119.7 | C(46) | C(45) | H(47) | 119.7 |
| C(45) | C(46) | H(48) | 119.3 | C(47) | C(46) | H(48) | 119.3 |
| C(48) | C(49) | H(49) | 119.6 | C(50) | C(49) | H(49) | 119.6 |
| C(49) | C(50) | H(50) | 119.6 | C(51) | C(50) | H(50) | 119.6 |
| C(50) | C(51) | H(51) | 120.5 | C(52) | C(51) | H(51) | 120.5 |
| C(51) | C(52) | H(52) | 119.6 | C(53) | C(52) | H(52) | 119.6 |
| C(48) | C(53) | H(53) | 119.6 | C(52) | C(53) | H(53) | 119.6 |
| C(54) | C(55) | H(54) | 119.3 | C(56) | C(55) | H(54) | 119.3 |
| C(55) | C(56) | H(55) | 119.6 | C(57) | C(56) | H(55) | 119.6 |

Table 7. Bond angles involving hydrogens ( $^{\circ}$ ) (continued)

| atom  | atom  | atom  | angle | atom  | atom  | atom  | angle |
|-------|-------|-------|-------|-------|-------|-------|-------|
| C(56) | C(57) | H(56) | 120.4 | C(58) | C(57) | H(56) | 120.4 |
| C(57) | C(58) | H(57) | 119.8 | C(59) | C(58) | H(57) | 119.8 |
| C(54) | C(59) | H(58) | 119.5 | C(58) | C(59) | H(58) | 119.5 |
| C(60) | C(61) | H(59) | 119.1 | C(62) | C(61) | H(59) | 119.1 |
| C(61) | C(62) | H(60) | 120.0 | C(63) | C(62) | H(60) | 120.0 |
| C(62) | C(63) | H(61) | 120.2 | C(64) | C(63) | H(61) | 120.2 |
| C(63) | C(64) | H(62) | 120.1 | C(65) | C(64) | H(62) | 120.1 |
| C(60) | C(65) | H(63) | 118.9 | C(64) | C(65) | H(63) | 118.9 |
| C(66) | C(67) | H(64) | 118.6 | C(68) | C(67) | H(64) | 118.6 |
| C(67) | C(68) | H(65) | 120.2 | C(69) | C(68) | H(65) | 120.2 |
| C(68) | C(69) | H(66) | 120.3 | C(70) | C(69) | H(66) | 120.3 |
| C(69) | C(70) | H(67) | 119.7 | C(71) | C(70) | H(67) | 119.7 |
| C(66) | C(71) | H(68) | 119.1 | C(70) | C(71) | H(68) | 119.1 |
| C(72) | C(73) | H(69) | 119.3 | C(74) | C(73) | H(69) | 119.2 |
| C(73) | C(74) | H(70) | 120.4 | C(75) | C(74) | H(70) | 120.4 |
| C(74) | C(75) | H(71) | 119.8 | C(76) | C(75) | H(71) | 119.8 |
| C(75) | C(76) | H(72) | 120.2 | C(77) | C(76) | H(72) | 120.2 |
| C(72) | C(77) | H(73) | 119.2 | C(76) | C(77) | H(73) | 119.2 |
| C(72) | C(78) | H(74) | 109.5 | C(72) | C(78) | H(75) | 109.5 |
| C(72) | C(78) | H(76) | 109.5 | H(74) | C(78) | H(75) | 109.5 |
| H(74) | C(78) | H(76) | 109.5 | H(75) | C(78) | H(76) | 109.5 |

Table 8. Torsion Angles(°)

| atom1 | atom2 | atom3 | atom4 | angle       | atom1 | atom2 | atom3 | atom4 | angle       |
|-------|-------|-------|-------|-------------|-------|-------|-------|-------|-------------|
| P(1)  | Mo(1) | P(2)  | C(9)  | -10.26(19)  | P(1)  | Mo(1) | P(2)  | C(24) | -122.4(2)   |
| P(1)  | Mo(1) | P(2)  | C(30) | 107.18(19)  | P(2)  | Mo(1) | P(1)  | C(8)  | -13.6(2)    |
| P(2)  | Mo(1) | P(1)  | C(12) | 101.63(19)  | P(2)  | Mo(1) | P(1)  | C(18) | -134.15(19) |
| P(1)  | Mo(1) | P(4)  | C(11) | -164.29(15) | P(1)  | Mo(1) | P(4)  | C(48) | 78.87(18)   |
| P(1)  | Mo(1) | P(4)  | C(54) | -45.3(2)    | P(4)  | Mo(1) | P(1)  | C(8)  | 78.5(2)     |
| P(4)  | Mo(1) | P(1)  | C(12) | -166.24(18) | P(4)  | Mo(1) | P(1)  | C(18) | -42.01(19)  |
| P(1)  | Mo(1) | Si(1) | C(47) | 147.78(17)  | P(1)  | Mo(1) | Si(1) | C(60) | -97.99(18)  |
| P(1)  | Mo(1) | Si(1) | C(66) | 28.5(2)     | Si(1) | Mo(1) | P(1)  | C(8)  | -178.1(2)   |
| Si(1) | Mo(1) | P(1)  | C(12) | -62.88(19)  | Si(1) | Mo(1) | P(1)  | C(18) | 61.35(19)   |
| C(1)  | Mo(1) | P(1)  | C(8)  | -105.6(2)   | C(1)  | Mo(1) | P(1)  | C(12) | 9.7(2)      |
| C(1)  | Mo(1) | P(1)  | C(18) | 133.9(2)    | P(2)  | Mo(1) | P(3)  | C(10) | 107.80(16)  |
| P(2)  | Mo(1) | P(3)  | C(36) | -13.9(2)    | P(2)  | Mo(1) | P(3)  | C(42) | -136.4(2)   |
| P(3)  | Mo(1) | P(2)  | C(9)  | 169.23(19)  | P(3)  | Mo(1) | P(2)  | C(24) | 57.1(2)     |
| P(3)  | Mo(1) | P(2)  | C(30) | -73.33(19)  | P(2)  | Mo(1) | P(4)  | C(11) | -84.23(16)  |
| P(2)  | Mo(1) | P(4)  | C(48) | 158.93(18)  | P(2)  | Mo(1) | P(4)  | C(54) | 34.8(2)     |
| P(4)  | Mo(1) | P(2)  | C(9)  | -111.11(19) | P(4)  | Mo(1) | P(2)  | C(24) | 136.8(2)    |
| P(4)  | Mo(1) | P(2)  | C(30) | 6.33(19)    | P(2)  | Mo(1) | Si(1) | C(47) | 28.4(2)     |
| P(2)  | Mo(1) | Si(1) | C(60) | 142.6(2)    | P(2)  | Mo(1) | Si(1) | C(66) | -90.9(2)    |
| Si(1) | Mo(1) | P(2)  | C(9)  | 113.3(2)    | Si(1) | Mo(1) | P(2)  | C(24) | 1.1(2)      |
| Si(1) | Mo(1) | P(2)  | C(30) | -129.3(2)   | C(1)  | Mo(1) | P(2)  | C(9)  | 82.5(2)     |
| C(1)  | Mo(1) | P(2)  | C(24) | -29.6(2)    | C(1)  | Mo(1) | P(2)  | C(30) | -160.1(2)   |
| P(3)  | Mo(1) | P(4)  | C(11) | 11.05(15)   | P(3)  | Mo(1) | P(4)  | C(48) | -105.79(18) |
| P(3)  | Mo(1) | P(4)  | C(54) | 130.1(2)    | P(4)  | Mo(1) | P(3)  | C(10) | 14.69(16)   |
| P(4)  | Mo(1) | P(3)  | C(36) | -107.0(2)   | P(4)  | Mo(1) | P(3)  | C(42) | 130.5(2)    |
| P(3)  | Mo(1) | Si(1) | C(47) | -30.43(17)  | P(3)  | Mo(1) | Si(1) | C(60) | 83.79(18)   |
| P(3)  | Mo(1) | Si(1) | C(66) | -149.7(2)   | Si(1) | Mo(1) | P(3)  | C(10) | -87.23(16)  |
| Si(1) | Mo(1) | P(3)  | C(36) | 151.0(2)    | Si(1) | Mo(1) | P(3)  | C(42) | 28.6(2)     |
| C(1)  | Mo(1) | P(3)  | C(10) | -160.1(2)   | C(1)  | Mo(1) | P(3)  | C(36) | 78.2(2)     |
| C(1)  | Mo(1) | P(3)  | C(42) | -44.2(2)    | P(4)  | Mo(1) | Si(1) | C(47) | -106.81(17) |
| P(4)  | Mo(1) | Si(1) | C(60) | 7.41(18)    | P(4)  | Mo(1) | Si(1) | C(66) | 133.9(2)    |
| Si(1) | Mo(1) | P(4)  | C(11) | 83.46(16)   | Si(1) | Mo(1) | P(4)  | C(48) | -33.38(18)  |
| Si(1) | Mo(1) | P(4)  | C(54) | -157.5(2)   | C(1)  | Mo(1) | P(4)  | C(11) | 31.5(5)     |
| C(1)  | Mo(1) | P(4)  | C(48) | -85.3(5)    | C(1)  | Mo(1) | P(4)  | C(54) | 150.6(5)    |
| C(1)  | Mo(1) | Si(1) | C(47) | 60.8(2)     | C(1)  | Mo(1) | Si(1) | C(60) | 175.0(2)    |
| C(1)  | Mo(1) | Si(1) | C(66) | -58.5(2)    | Mo(1) | P(1)  | C(8)  | C(9)  | 41.5(3)     |
| Mo(1) | P(1)  | C(12) | C(13) | 134.3(3)    | Mo(1) | P(1)  | C(12) | C(17) | -44.4(4)    |
| Mo(1) | P(1)  | C(18) | C(19) | -58.7(4)    | Mo(1) | P(1)  | C(18) | C(23) | 121.5(3)    |

Table 8. Torsion angles ( $^{\circ}$ ) (continued)

| atom1 | atom2 | atom3 | atom4 | angle     | atom1 | atom2 | atom3 | atom4 | angle     |
|-------|-------|-------|-------|-----------|-------|-------|-------|-------|-----------|
| C(8)  | P(1)  | C(12) | C(13) | -104.6(4) | C(8)  | P(1)  | C(12) | C(17) | 76.7(4)   |
| C(12) | P(1)  | C(8)  | C(9)  | -87.1(3)  | C(8)  | P(1)  | C(18) | C(19) | 177.2(4)  |
| C(8)  | P(1)  | C(18) | C(23) | -2.7(4)   | C(18) | P(1)  | C(8)  | C(9)  | 172.1(3)  |
| C(12) | P(1)  | C(18) | C(19) | 75.8(4)   | C(12) | P(1)  | C(18) | C(23) | -104.0(4) |
| C(18) | P(1)  | C(12) | C(13) | 0.1(3)    | C(18) | P(1)  | C(12) | C(17) | -178.6(3) |
| Mo(1) | P(2)  | C(9)  | C(8)  | 38.9(3)   | Mo(1) | P(2)  | C(24) | C(25) | 42.3(4)   |
| Mo(1) | P(2)  | C(24) | C(29) | -139.3(3) | Mo(1) | P(2)  | C(30) | C(31) | -110.8(4) |
| Mo(1) | P(2)  | C(30) | C(35) | 70.6(4)   | C(9)  | P(2)  | C(24) | C(25) | -75.2(4)  |
| C(9)  | P(2)  | C(24) | C(29) | 103.2(4)  | C(24) | P(2)  | C(9)  | C(8)  | 168.6(3)  |
| C(9)  | P(2)  | C(30) | C(31) | 9.3(5)    | C(9)  | P(2)  | C(30) | C(35) | -169.4(4) |
| C(30) | P(2)  | C(9)  | C(8)  | -89.2(3)  | C(24) | P(2)  | C(30) | C(31) | 108.8(5)  |
| C(24) | P(2)  | C(30) | C(35) | -69.8(4)  | C(30) | P(2)  | C(24) | C(25) | -179.7(3) |
| C(30) | P(2)  | C(24) | C(29) | -1.3(4)   | Mo(1) | P(3)  | C(10) | C(11) | -44.2(3)  |
| Mo(1) | P(3)  | C(36) | C(37) | 118.3(3)  | Mo(1) | P(3)  | C(36) | C(41) | -63.0(4)  |
| Mo(1) | P(3)  | C(42) | C(43) | 162.3(4)  | Mo(1) | P(3)  | C(42) | C(47) | -19.0(4)  |
| C(10) | P(3)  | C(36) | C(37) | -7.0(4)   | C(10) | P(3)  | C(36) | C(41) | 171.7(3)  |
| C(36) | P(3)  | C(10) | C(11) | 89.7(3)   | C(10) | P(3)  | C(42) | C(43) | -77.8(5)  |
| C(10) | P(3)  | C(42) | C(47) | 101.0(4)  | C(42) | P(3)  | C(10) | C(11) | -167.1(3) |
| C(36) | P(3)  | C(42) | C(43) | 27.4(5)   | C(36) | P(3)  | C(42) | C(47) | -153.8(4) |
| C(42) | P(3)  | C(36) | C(37) | -112.8(4) | C(42) | P(3)  | C(36) | C(41) | 65.9(4)   |
| Mo(1) | P(4)  | C(11) | C(10) | -41.2(3)  | Mo(1) | P(4)  | C(48) | C(49) | -68.3(4)  |
| Mo(1) | P(4)  | C(48) | C(53) | 116.6(4)  | Mo(1) | P(4)  | C(54) | C(55) | 50.3(5)   |
| Mo(1) | P(4)  | C(54) | C(59) | -137.8(4) | C(11) | P(4)  | C(48) | C(49) | 171.9(4)  |
| C(11) | P(4)  | C(48) | C(53) | -3.2(5)   | C(48) | P(4)  | C(11) | C(10) | 88.1(3)   |
| C(11) | P(4)  | C(54) | C(55) | 172.3(4)  | C(11) | P(4)  | C(54) | C(59) | -15.8(5)  |
| C(54) | P(4)  | C(11) | C(10) | -175.2(3) | C(48) | P(4)  | C(54) | C(55) | -84.9(4)  |
| C(48) | P(4)  | C(54) | C(59) | 87.0(5)   | C(54) | P(4)  | C(48) | C(49) | 69.7(4)   |
| C(54) | P(4)  | C(48) | C(53) | -105.4(4) | Mo(1) | Si(1) | C(47) | C(42) | 32.5(4)   |
| Mo(1) | Si(1) | C(47) | C(46) | -156.4(4) | Mo(1) | Si(1) | C(60) | C(61) | -108.5(4) |
| Mo(1) | Si(1) | C(60) | C(65) | 76.9(4)   | Mo(1) | Si(1) | C(66) | C(67) | 6.0(5)    |
| Mo(1) | Si(1) | C(66) | C(71) | -174.8(3) | C(47) | Si(1) | C(60) | C(61) | 9.1(4)    |
| C(47) | Si(1) | C(60) | C(65) | -165.6(4) | C(60) | Si(1) | C(47) | C(42) | -96.9(4)  |
| C(60) | Si(1) | C(47) | C(46) | 74.2(4)   | C(47) | Si(1) | C(66) | C(67) | -113.7(4) |
| C(47) | Si(1) | C(66) | C(71) | 65.5(5)   | C(66) | Si(1) | C(47) | C(42) | 159.9(3)  |
| C(66) | Si(1) | C(47) | C(46) | -29.0(5)  | C(60) | Si(1) | C(66) | C(67) | 143.1(4)  |
| C(60) | Si(1) | C(66) | C(71) | -37.7(5)  | C(66) | Si(1) | C(60) | C(61) | 117.1(4)  |
| C(66) | Si(1) | C(60) | C(65) | -57.5(4)  | C(1)  | N(1)  | C(2B) | C(3B) | 131.7(10) |

Table 8. Torsion angles ( $^{\circ}$ ) (continued)

| atom1 | atom2 | atom3 | atom4 | angle      | atom1 | atom2 | atom3 | atom4 | angle     |
|-------|-------|-------|-------|------------|-------|-------|-------|-------|-----------|
| C(1)  | N(1)  | C(2B) | C(7B) | -103.9(12) | N(1)  | C(2A) | C(3A) | C(4A) | -180.0(8) |
| N(1)  | C(2A) | C(7A) | C(6A) | -178.7(10) | C(3A) | C(2A) | C(7A) | C(6A) | 61.1(16)  |
| C(7A) | C(2A) | C(3A) | C(4A) | -62.6(15)  | N(1)  | C(2B) | C(3B) | C(4B) | 69.6(13)  |
| N(1)  | C(2B) | C(7B) | C(6B) | -65.2(14)  | C(3B) | C(2B) | C(7B) | C(6B) | 57.9(14)  |
| C(7B) | C(2B) | C(3B) | C(4B) | -55.2(13)  | C(2A) | C(3A) | C(4A) | C(5A) | 57.2(12)  |
| C(2B) | C(3B) | C(4B) | C(5B) | 55.6(16)   | C(3A) | C(4A) | C(5A) | C(6A) | -55.5(15) |
| C(3B) | C(4B) | C(5B) | C(6B) | -58.6(16)  | C(4A) | C(5A) | C(6A) | C(7A) | 54.3(15)  |
| C(4B) | C(5B) | C(6B) | C(7B) | 65.0(17)   | C(5A) | C(6A) | C(7A) | C(2A) | -55.0(14) |
| C(5B) | C(6B) | C(7B) | C(2B) | -64.8(17)  | P(1)  | C(8)  | C(9)  | P(2)  | -51.5(4)  |
| P(3)  | C(10) | C(11) | P(4)  | 54.6(4)    | P(1)  | C(12) | C(13) | C(14) | -178.3(3) |
| P(1)  | C(12) | C(17) | C(16) | 179.8(3)   | C(13) | C(12) | C(17) | C(16) | 1.0(6)    |
| C(17) | C(12) | C(13) | C(14) | 0.4(6)     | C(12) | C(13) | C(14) | C(15) | -1.7(7)   |
| C(13) | C(14) | C(15) | C(16) | 1.6(7)     | C(14) | C(15) | C(16) | C(17) | -0.2(6)   |
| C(15) | C(16) | C(17) | C(12) | -1.1(7)    | P(1)  | C(18) | C(19) | C(20) | -180.0(3) |
| P(1)  | C(18) | C(23) | C(22) | -177.3(4)  | C(19) | C(18) | C(23) | C(22) | 2.9(7)    |
| C(23) | C(18) | C(19) | C(20) | -0.1(6)    | C(18) | C(19) | C(20) | C(21) | -2.0(8)   |
| C(19) | C(20) | C(21) | C(22) | 1.2(8)     | C(20) | C(21) | C(22) | C(23) | 1.6(8)    |
| C(21) | C(22) | C(23) | C(18) | -3.7(8)    | P(2)  | C(24) | C(25) | C(26) | 177.9(4)  |
| P(2)  | C(24) | C(29) | C(28) | -178.2(4)  | C(25) | C(24) | C(29) | C(28) | 0.2(6)    |
| C(29) | C(24) | C(25) | C(26) | -0.6(7)    | C(24) | C(25) | C(26) | C(27) | 0.4(7)    |
| C(25) | C(26) | C(27) | C(28) | 0.2(6)     | C(26) | C(27) | C(28) | C(29) | -0.6(8)   |
| C(27) | C(28) | C(29) | C(24) | 0.4(8)     | P(2)  | C(30) | C(31) | C(32) | -178.2(4) |
| P(2)  | C(30) | C(35) | C(34) | 178.5(4)   | C(31) | C(30) | C(35) | C(34) | -0.2(6)   |
| C(35) | C(30) | C(31) | C(32) | 0.4(8)     | C(30) | C(31) | C(32) | C(33) | -0.5(9)   |
| C(31) | C(32) | C(33) | C(34) | 0.5(9)     | C(32) | C(33) | C(34) | C(35) | -0.3(8)   |
| C(33) | C(34) | C(35) | C(30) | 0.2(6)     | P(3)  | C(36) | C(37) | C(38) | 179.8(3)  |
| P(3)  | C(36) | C(41) | C(40) | -179.4(3)  | C(37) | C(36) | C(41) | C(40) | -0.6(7)   |
| C(41) | C(36) | C(37) | C(38) | 1.1(7)     | C(36) | C(37) | C(38) | C(39) | -0.9(7)   |
| C(37) | C(38) | C(39) | C(40) | 0.1(6)     | C(38) | C(39) | C(40) | C(41) | 0.4(7)    |
| C(39) | C(40) | C(41) | C(36) | -0.2(5)    | P(3)  | C(42) | C(43) | C(44) | -179.6(4) |
| P(3)  | C(42) | C(47) | Si(1) | -10.1(5)   | P(3)  | C(42) | C(47) | C(46) | 178.0(4)  |
| C(43) | C(42) | C(47) | Si(1) | 168.7(4)   | C(43) | C(42) | C(47) | C(46) | -3.2(7)   |
| C(47) | C(42) | C(43) | C(44) | 1.7(8)     | C(42) | C(43) | C(44) | C(45) | 1.3(8)    |
| C(43) | C(44) | C(45) | C(46) | -2.7(8)    | C(44) | C(45) | C(46) | C(47) | 1.1(8)    |
| C(45) | C(46) | C(47) | Si(1) | -169.1(4)  | C(45) | C(46) | C(47) | C(42) | 1.9(8)    |
| P(4)  | C(48) | C(49) | C(50) | -173.3(4)  | P(4)  | C(48) | C(53) | C(52) | 172.2(4)  |
| C(49) | C(48) | C(53) | C(52) | -2.9(7)    | C(53) | C(48) | C(49) | C(50) | 2.1(7)    |

Table 8. Torsion angles ( $^{\circ}$ ) (continued)

| atom1 | atom2 | atom3 | atom4 | angle     | atom1 | atom2 | atom3 | atom4 | angle     |
|-------|-------|-------|-------|-----------|-------|-------|-------|-------|-----------|
| C(48) | C(49) | C(50) | C(51) | 0.7(8)    | C(49) | C(50) | C(51) | C(52) | -2.6(8)   |
| C(50) | C(51) | C(52) | C(53) | 1.8(8)    | C(51) | C(52) | C(53) | C(48) | 1.0(8)    |
| P(4)  | C(54) | C(55) | C(56) | 171.6(4)  | P(4)  | C(54) | C(59) | C(58) | -171.5(4) |
| C(55) | C(54) | C(59) | C(58) | 0.5(8)    | C(59) | C(54) | C(55) | C(56) | -0.9(8)   |
| C(54) | C(55) | C(56) | C(57) | -0.0(7)   | C(55) | C(56) | C(57) | C(58) | 1.5(9)    |
| C(56) | C(57) | C(58) | C(59) | -1.9(9)   | C(57) | C(58) | C(59) | C(54) | 0.9(9)    |
| Si(1) | C(60) | C(61) | C(62) | -173.1(4) | Si(1) | C(60) | C(65) | C(64) | 173.0(4)  |
| C(61) | C(60) | C(65) | C(64) | -1.9(7)   | C(65) | C(60) | C(61) | C(62) | 1.8(7)    |
| C(60) | C(61) | C(62) | C(63) | 0.1(6)    | C(61) | C(62) | C(63) | C(64) | -1.9(8)   |
| C(62) | C(63) | C(64) | C(65) | 1.7(8)    | C(63) | C(64) | C(65) | C(60) | 0.2(6)    |
| Si(1) | C(66) | C(67) | C(68) | 178.4(4)  | Si(1) | C(66) | C(71) | C(70) | -178.0(4) |
| C(67) | C(66) | C(71) | C(70) | 1.3(8)    | C(71) | C(66) | C(67) | C(68) | -0.9(8)   |
| C(66) | C(67) | C(68) | C(69) | -0.3(8)   | C(67) | C(68) | C(69) | C(70) | 1.1(8)    |
| C(68) | C(69) | C(70) | C(71) | -0.7(8)   | C(69) | C(70) | C(71) | C(66) | -0.5(8)   |
| C(73) | C(72) | C(77) | C(76) | -0.7(9)   | C(77) | C(72) | C(73) | C(74) | 0.9(9)    |
| C(78) | C(72) | C(73) | C(74) | -178.5(6) | C(78) | C(72) | C(77) | C(76) | 178.8(6)  |
| C(72) | C(73) | C(74) | C(75) | -0.5(9)   | C(73) | C(74) | C(75) | C(76) | -0.2(8)   |
| C(74) | C(75) | C(76) | C(77) | 0.4(9)    | C(75) | C(76) | C(77) | C(72) | 0.0(10)   |

The sign is positive if when looking from atom 2 to atom 3 a clock-wise motion of atom 1 would superimpose it on atom 4.

Table 9. Distances beyond the asymmetric unit out to 3.60 Å

| atom  | atom                | distance | atom  | atom                | distance |
|-------|---------------------|----------|-------|---------------------|----------|
| C(13) | C(22) <sup>1)</sup> | 3.562(6) | C(13) | C(23) <sup>1)</sup> | 3.530(6) |
| C(21) | C(34) <sup>2)</sup> | 3.586(7) | C(22) | C(13) <sup>1)</sup> | 3.562(6) |
| C(23) | C(13) <sup>1)</sup> | 3.530(6) | C(34) | C(21) <sup>3)</sup> | 3.586(7) |
| C(39) | C(70) <sup>3)</sup> | 3.525(8) | C(40) | C(69) <sup>3)</sup> | 3.588(8) |
| C(45) | C(71) <sup>4)</sup> | 3.507(7) | C(50) | C(50) <sup>5)</sup> | 3.310(8) |
| C(69) | C(40) <sup>2)</sup> | 3.588(8) | C(70) | C(39) <sup>2)</sup> | 3.525(8) |
| C(71) | C(45) <sup>4)</sup> | 3.507(7) |       |                     |          |

Symmetry Operators:

- |                    |                  |
|--------------------|------------------|
| (1) -X+1,-Y,-Z+1   | (2) X+1,Y,Z      |
| (3) X-1,Y,Z        | (4) -X+1,-Y+1,-Z |
| (5) -X+1,-Y+1,-Z+1 |                  |



Table 10. Distances beyond the asymmetric unit out to 3.60 Å involving hydrogens

| atom  | atom                 | distance | atom  | atom                 | distance |
|-------|----------------------|----------|-------|----------------------|----------|
| C(3B) | H(2B) <sup>1)</sup>  | 3.566    | C(3B) | H(4A) <sup>1)</sup>  | 3.241    |
| C(3B) | H(5A) <sup>1)</sup>  | 3.392    | C(4A) | H(2A) <sup>1)</sup>  | 3.504    |
| C(4A) | H(2B) <sup>1)</sup>  | 3.414    | C(4A) | H(3B) <sup>1)</sup>  | 3.230    |
| C(4A) | H(5A) <sup>1)</sup>  | 3.458    | C(4A) | H(61) <sup>2)</sup>  | 3.426    |
| C(4A) | H(65) <sup>1)</sup>  | 3.286    | C(4B) | H(66) <sup>1)</sup>  | 3.399    |
| C(4B) | H(73) <sup>3)</sup>  | 3.269    | C(4B) | H(74) <sup>3)</sup>  | 2.812    |
| C(5A) | H(22) <sup>1)</sup>  | 3.551    | C(5A) | H(61) <sup>2)</sup>  | 3.424    |
| C(5A) | H(65) <sup>1)</sup>  | 3.244    | C(5B) | H(66) <sup>1)</sup>  | 3.032    |
| C(5B) | H(73) <sup>3)</sup>  | 3.536    | C(6B) | H(71) <sup>4)</sup>  | 3.436    |
| C(7A) | H(71) <sup>4)</sup>  | 3.442    | C(7B) | H(71) <sup>4)</sup>  | 3.039    |
| C(11) | H(57) <sup>5)</sup>  | 2.960    | C(12) | H(28) <sup>6)</sup>  | 3.053    |
| C(13) | H(28) <sup>6)</sup>  | 2.981    | C(13) | H(29) <sup>6)</sup>  | 2.897    |
| C(13) | H(33) <sup>7)</sup>  | 3.163    | C(14) | H(28) <sup>6)</sup>  | 3.059    |
| C(14) | H(29) <sup>6)</sup>  | 3.213    | C(14) | H(32) <sup>7)</sup>  | 3.324    |
| C(14) | H(33) <sup>7)</sup>  | 3.173    | C(14) | H(55) <sup>6)</sup>  | 2.917    |
| C(15) | H(4A) <sup>1)</sup>  | 3.428    | C(15) | H(7A) <sup>1)</sup>  | 3.493    |
| C(15) | H(28) <sup>6)</sup>  | 3.169    | C(15) | H(52) <sup>3)</sup>  | 3.083    |
| C(15) | H(55) <sup>6)</sup>  | 3.372    | C(15) | H(61) <sup>3)</sup>  | 3.180    |
| C(16) | H(4A) <sup>1)</sup>  | 3.538    | C(16) | H(28) <sup>6)</sup>  | 3.208    |
| C(16) | H(52) <sup>3)</sup>  | 2.949    | C(16) | H(74) <sup>3)</sup>  | 3.198    |
| C(17) | H(28) <sup>6)</sup>  | 3.158    | C(21) | H(12) <sup>6)</sup>  | 3.237    |
| C(21) | H(38) <sup>7)</sup>  | 3.339    | C(22) | H(12) <sup>6)</sup>  | 2.794    |
| C(22) | H(51) <sup>8)</sup>  | 3.371    | C(22) | H(52) <sup>8)</sup>  | 3.422    |
| C(23) | H(12) <sup>6)</sup>  | 3.211    | C(23) | H(20) <sup>6)</sup>  | 3.439    |
| C(25) | H(36) <sup>9)</sup>  | 3.437    | C(25) | H(76) <sup>3)</sup>  | 3.070    |
| C(26) | H(36) <sup>9)</sup>  | 3.287    | C(26) | H(69) <sup>3)</sup>  | 3.360    |
| C(26) | H(76) <sup>3)</sup>  | 2.901    | C(27) | H(21) <sup>10)</sup> | 3.182    |
| C(27) | H(36) <sup>9)</sup>  | 3.374    | C(27) | H(69) <sup>3)</sup>  | 3.512    |
| C(28) | H(20) <sup>10)</sup> | 3.527    | C(28) | H(21) <sup>10)</sup> | 3.195    |
| C(28) | H(35) <sup>9)</sup>  | 3.246    | C(29) | H(14) <sup>9)</sup>  | 3.550    |
| C(29) | H(35) <sup>9)</sup>  | 3.212    | C(31) | H(14) <sup>9)</sup>  | 3.464    |
| C(32) | H(14) <sup>9)</sup>  | 3.542    | C(32) | H(69) <sup>5)</sup>  | 3.446    |
| C(32) | H(76) <sup>5)</sup>  | 3.499    | C(33) | H(19) <sup>5)</sup>  | 3.498    |
| C(33) | H(27) <sup>10)</sup> | 2.984    | C(33) | H(58) <sup>5)</sup>  | 3.398    |
| C(34) | H(26) <sup>10)</sup> | 3.530    | C(34) | H(27) <sup>10)</sup> | 2.756    |
| C(34) | H(57) <sup>5)</sup>  | 3.246    | C(34) | H(58) <sup>5)</sup>  | 3.237    |
| C(35) | H(27) <sup>10)</sup> | 3.586    | C(37) | H(46) <sup>4)</sup>  | 3.445    |

Table 10. Distances beyond the asymmetric unit out to 3.60 Å involving hydrogens (continued)

| atom  | atom                 | distance | atom  | atom                 | distance |
|-------|----------------------|----------|-------|----------------------|----------|
| C(38) | H(26) <sup>10)</sup> | 3.023    | C(38) | H(46) <sup>4)</sup>  | 3.288    |
| C(38) | H(47) <sup>4)</sup>  | 3.385    | C(38) | H(62) <sup>10)</sup> | 3.435    |
| C(38) | H(63) <sup>10)</sup> | 3.565    | C(39) | H(26) <sup>10)</sup> | 3.155    |
| C(39) | H(46) <sup>4)</sup>  | 3.337    | C(39) | H(47) <sup>4)</sup>  | 3.526    |
| C(40) | H(46) <sup>4)</sup>  | 3.527    | C(40) | H(66) <sup>10)</sup> | 3.524    |
| C(40) | H(72) <sup>4)</sup>  | 3.434    | C(43) | H(45) <sup>4)</sup>  | 3.545    |
| C(43) | H(46) <sup>4)</sup>  | 3.228    | C(43) | H(71) <sup>4)</sup>  | 3.369    |
| C(43) | H(72)                | 3.360    | C(44) | H(45) <sup>4)</sup>  | 3.156    |
| C(44) | H(67) <sup>2)</sup>  | 3.227    | C(44) | H(71) <sup>4)</sup>  | 2.852    |
| C(44) | H(72)                | 3.339    | C(45) | H(67) <sup>2)</sup>  | 3.139    |
| C(45) | H(68) <sup>2)</sup>  | 2.920    | C(45) | H(71) <sup>4)</sup>  | 3.331    |
| C(46) | H(67) <sup>2)</sup>  | 3.513    | C(46) | H(68) <sup>2)</sup>  | 2.937    |
| C(49) | H(50) <sup>8)</sup>  | 3.536    | C(50) | H(50) <sup>8)</sup>  | 3.096    |
| C(51) | H(28) <sup>8)</sup>  | 3.513    | C(51) | H(50) <sup>8)</sup>  | 3.339    |
| C(51) | H(55) <sup>8)</sup>  | 3.587    | C(52) | H(27) <sup>8)</sup>  | 3.572    |
| C(52) | H(28) <sup>8)</sup>  | 3.335    | C(52) | H(75)                | 3.334    |
| C(53) | H(37) <sup>5)</sup>  | 3.300    | C(53) | H(75)                | 2.955    |
| C(55) | H(51) <sup>8)</sup>  | 3.300    | C(56) | H(21) <sup>6)</sup>  | 3.228    |
| C(56) | H(51) <sup>8)</sup>  | 2.860    | C(57) | H(51) <sup>8)</sup>  | 3.480    |
| C(57) | H(69) <sup>5)</sup>  | 3.085    | C(57) | H(70) <sup>5)</sup>  | 3.365    |
| C(58) | H(18) <sup>5)</sup>  | 3.273    | C(58) | H(19) <sup>5)</sup>  | 3.511    |
| C(58) | H(38) <sup>5)</sup>  | 2.995    | C(58) | H(58) <sup>5)</sup>  | 3.235    |
| C(59) | H(38) <sup>5)</sup>  | 3.091    | C(59) | H(57) <sup>5)</sup>  | 3.600    |
| C(59) | H(58) <sup>5)</sup>  | 3.160    | C(61) | H(48) <sup>2)</sup>  | 3.303    |
| C(61) | H(67) <sup>2)</sup>  | 3.191    | C(61) | H(68) <sup>2)</sup>  | 3.526    |
| C(61) | H(73)                | 3.546    | C(62) | H(48) <sup>2)</sup>  | 3.052    |
| C(62) | H(67) <sup>2)</sup>  | 3.421    | C(62) | H(73)                | 3.421    |
| C(63) | H(4A) <sup>2)</sup>  | 3.586    | C(63) | H(6A) <sup>2)</sup>  | 3.543    |
| C(63) | H(22) <sup>11)</sup> | 3.049    | C(63) | H(47) <sup>2)</sup>  | 3.120    |
| C(63) | H(48) <sup>2)</sup>  | 3.335    | C(64) | H(41) <sup>7)</sup>  | 3.135    |
| C(64) | H(47) <sup>2)</sup>  | 2.827    | C(65) | H(41) <sup>7)</sup>  | 3.304    |
| C(65) | H(47) <sup>2)</sup>  | 3.149    | C(66) | H(42) <sup>7)</sup>  | 3.295    |
| C(67) | H(42) <sup>7)</sup>  | 3.349    | C(68) | H(5A) <sup>1)</sup>  | 3.234    |
| C(68) | H(6B) <sup>1)</sup>  | 3.587    | C(68) | H(7A) <sup>1)</sup>  | 3.226    |
| C(68) | H(42) <sup>7)</sup>  | 3.248    | C(68) | H(43) <sup>7)</sup>  | 3.533    |
| C(69) | H(5A) <sup>1)</sup>  | 3.342    | C(69) | H(5B) <sup>1)</sup>  | 3.222    |
| C(69) | H(6B) <sup>1)</sup>  | 3.385    | C(69) | H(7A) <sup>1)</sup>  | 3.554    |

Table 10. Distances beyond the asymmetric unit out to 3.60 Å involving hydrogens (continued)

| atom  | atom                 | distance | atom  | atom                 | distance |
|-------|----------------------|----------|-------|----------------------|----------|
| C(69) | H(42) <sup>7)</sup>  | 3.052    | C(69) | H(43) <sup>7)</sup>  | 2.960    |
| C(69) | H(60) <sup>2)</sup>  | 3.566    | C(69) | H(72) <sup>2)</sup>  | 3.416    |
| C(69) | H(73) <sup>2)</sup>  | 3.128    | C(70) | H(42) <sup>7)</sup>  | 2.935    |
| C(70) | H(43) <sup>7)</sup>  | 3.457    | C(70) | H(47) <sup>2)</sup>  | 3.599    |
| C(70) | H(59) <sup>2)</sup>  | 3.135    | C(70) | H(60) <sup>2)</sup>  | 3.075    |
| C(70) | H(72) <sup>2)</sup>  | 3.248    | C(70) | H(73) <sup>2)</sup>  | 3.067    |
| C(71) | H(42) <sup>7)</sup>  | 3.046    | C(71) | H(47) <sup>2)</sup>  | 3.270    |
| C(71) | H(59) <sup>2)</sup>  | 3.489    | C(71) | H(60) <sup>2)</sup>  | 3.508    |
| C(72) | H(4B) <sup>11)</sup> | 3.464    | C(72) | H(7B) <sup>11)</sup> | 3.555    |
| C(72) | H(16)                | 3.356    | C(72) | H(17)                | 3.118    |
| C(72) | H(31) <sup>11)</sup> | 3.132    | C(73) | H(17)                | 2.984    |
| C(73) | H(31) <sup>11)</sup> | 3.116    | C(73) | H(36) <sup>5)</sup>  | 3.567    |
| C(73) | H(56) <sup>5)</sup>  | 3.092    | C(74) | H(6A) <sup>4)</sup>  | 3.353    |
| C(74) | H(8B) <sup>4)</sup>  | 3.577    | C(74) | H(9A) <sup>4)</sup>  | 3.155    |
| C(74) | H(17)                | 3.087    | C(74) | H(40)                | 3.428    |
| C(74) | H(56) <sup>5)</sup>  | 3.013    | C(75) | H(6A) <sup>4)</sup>  | 3.557    |
| C(75) | H(8B) <sup>4)</sup>  | 2.942    | C(75) | H(9A) <sup>4)</sup>  | 2.965    |
| C(75) | H(10A) <sup>4)</sup> | 3.270    | C(75) | H(10B) <sup>4)</sup> | 3.222    |
| C(75) | H(11B) <sup>4)</sup> | 3.404    | C(75) | H(17)                | 3.303    |
| C(75) | H(45)                | 3.343    | C(75) | H(46) <sup>4)</sup>  | 3.448    |
| C(76) | H(7B) <sup>11)</sup> | 3.571    | C(76) | H(8B) <sup>4)</sup>  | 3.194    |
| C(76) | H(9A) <sup>4)</sup>  | 3.401    | C(76) | H(17)                | 3.424    |
| C(76) | H(45)                | 3.369    | C(76) | H(66) <sup>2)</sup>  | 3.386    |
| C(76) | H(67) <sup>2)</sup>  | 3.128    | C(77) | H(4B) <sup>11)</sup> | 3.599    |
| C(77) | H(5B) <sup>11)</sup> | 3.402    | C(77) | H(7B) <sup>11)</sup> | 3.092    |
| C(77) | H(16)                | 3.416    | C(77) | H(17)                | 3.326    |
| C(77) | H(59)                | 3.508    | C(77) | H(66) <sup>2)</sup>  | 3.250    |
| C(77) | H(67) <sup>2)</sup>  | 3.108    | C(78) | H(4B) <sup>11)</sup> | 2.858    |
| C(78) | H(5B) <sup>11)</sup> | 3.512    | C(78) | H(23) <sup>11)</sup> | 3.040    |
| C(78) | H(31) <sup>11)</sup> | 3.201    | C(78) | H(36) <sup>5)</sup>  | 3.464    |
| C(78) | H(37) <sup>5)</sup>  | 3.465    | C(78) | H(53)                | 3.104    |
| H(1A) | H(74) <sup>3)</sup>  | 2.984    | H(1A) | H(76) <sup>3)</sup>  | 3.584    |
| H(2A) | C(4A) <sup>1)</sup>  | 3.504    | H(2A) | H(2B) <sup>1)</sup>  | 3.414    |
| H(2A) | H(4A) <sup>1)</sup>  | 3.191    | H(2A) | H(5A) <sup>1)</sup>  | 2.890    |
| H(2B) | C(3B) <sup>1)</sup>  | 3.566    | H(2B) | C(4A) <sup>1)</sup>  | 3.414    |
| H(2B) | H(2A) <sup>1)</sup>  | 3.414    | H(2B) | H(2B) <sup>1)</sup>  | 3.031    |
| H(2B) | H(3B) <sup>1)</sup>  | 3.247    | H(2B) | H(4A) <sup>1)</sup>  | 3.112    |

Table 10. Distances beyond the asymmetric unit out to 3.60 Å involving hydrogens (continued)

| atom  | atom                 | distance | atom  | atom                 | distance |
|-------|----------------------|----------|-------|----------------------|----------|
| H(2B) | H(5A) <sup>1)</sup>  | 2.929    | H(3A) | H(60) <sup>2)</sup>  | 3.312    |
| H(3A) | H(61) <sup>2)</sup>  | 3.217    | H(3B) | C(4A) <sup>1)</sup>  | 3.230    |
| H(3B) | H(2B) <sup>1)</sup>  | 3.247    | H(3B) | H(4A) <sup>1)</sup>  | 2.630    |
| H(3B) | H(5A) <sup>1)</sup>  | 2.920    | H(4A) | C(3B) <sup>1)</sup>  | 3.241    |
| H(4A) | C(15) <sup>1)</sup>  | 3.428    | H(4A) | C(16) <sup>1)</sup>  | 3.538    |
| H(4A) | C(63) <sup>2)</sup>  | 3.586    | H(4A) | H(2A) <sup>1)</sup>  | 3.191    |
| H(4A) | H(2B) <sup>1)</sup>  | 3.112    | H(4A) | H(3B) <sup>1)</sup>  | 2.630    |
| H(4A) | H(5A) <sup>1)</sup>  | 3.113    | H(4A) | H(5B) <sup>1)</sup>  | 3.157    |
| H(4A) | H(22) <sup>1)</sup>  | 3.110    | H(4A) | H(23) <sup>1)</sup>  | 3.301    |
| H(4A) | H(60) <sup>2)</sup>  | 3.275    | H(4A) | H(61) <sup>2)</sup>  | 2.829    |
| H(4A) | H(65) <sup>1)</sup>  | 3.209    | H(4B) | C(72) <sup>3)</sup>  | 3.464    |
| H(4B) | C(77) <sup>3)</sup>  | 3.599    | H(4B) | C(78) <sup>3)</sup>  | 2.858    |
| H(4B) | H(73) <sup>3)</sup>  | 3.237    | H(4B) | H(74) <sup>3)</sup>  | 2.148    |
| H(4B) | H(76) <sup>3)</sup>  | 2.858    | H(5A) | C(3B) <sup>1)</sup>  | 3.392    |
| H(5A) | C(4A) <sup>1)</sup>  | 3.458    | H(5A) | C(68) <sup>1)</sup>  | 3.234    |
| H(5A) | C(69) <sup>1)</sup>  | 3.342    | H(5A) | H(2A) <sup>1)</sup>  | 2.890    |
| H(5A) | H(2B) <sup>1)</sup>  | 2.929    | H(5A) | H(3B) <sup>1)</sup>  | 2.920    |
| H(5A) | H(4A) <sup>1)</sup>  | 3.113    | H(5A) | H(5A) <sup>1)</sup>  | 3.214    |
| H(5A) | H(65) <sup>1)</sup>  | 2.919    | H(5A) | H(66) <sup>1)</sup>  | 3.107    |
| H(5B) | C(69) <sup>1)</sup>  | 3.222    | H(5B) | C(77) <sup>3)</sup>  | 3.402    |
| H(5B) | C(78) <sup>3)</sup>  | 3.512    | H(5B) | H(4A) <sup>1)</sup>  | 3.157    |
| H(5B) | H(60) <sup>3)</sup>  | 3.047    | H(5B) | H(66) <sup>1)</sup>  | 2.811    |
| H(5B) | H(73) <sup>3)</sup>  | 2.690    | H(5B) | H(74) <sup>3)</sup>  | 2.627    |
| H(6A) | C(63) <sup>2)</sup>  | 3.543    | H(6A) | C(74) <sup>4)</sup>  | 3.353    |
| H(6A) | C(75) <sup>4)</sup>  | 3.557    | H(6A) | H(22) <sup>1)</sup>  | 3.209    |
| H(6A) | H(61) <sup>2)</sup>  | 2.705    | H(6A) | H(70) <sup>4)</sup>  | 2.927    |
| H(6A) | H(71) <sup>4)</sup>  | 3.306    | H(6B) | C(68) <sup>1)</sup>  | 3.587    |
| H(6B) | C(69) <sup>1)</sup>  | 3.385    | H(6B) | H(65) <sup>1)</sup>  | 3.110    |
| H(6B) | H(66) <sup>1)</sup>  | 2.695    | H(7A) | C(15) <sup>1)</sup>  | 3.493    |
| H(7A) | C(68) <sup>1)</sup>  | 3.226    | H(7A) | C(69) <sup>1)</sup>  | 3.554    |
| H(7A) | H(22) <sup>1)</sup>  | 3.172    | H(7A) | H(32) <sup>12)</sup> | 3.002    |
| H(7A) | H(65) <sup>1)</sup>  | 2.450    | H(7A) | H(66) <sup>1)</sup>  | 3.121    |
| H(7B) | C(72) <sup>3)</sup>  | 3.555    | H(7B) | C(76) <sup>3)</sup>  | 3.571    |
| H(7B) | C(77) <sup>3)</sup>  | 3.092    | H(7B) | H(8B) <sup>12)</sup> | 3.543    |
| H(7B) | H(9A) <sup>12)</sup> | 3.473    | H(7B) | H(66) <sup>1)</sup>  | 2.753    |
| H(7B) | H(73) <sup>3)</sup>  | 2.958    | H(7B) | H(74) <sup>3)</sup>  | 3.560    |
| H(8A) | H(66) <sup>1)</sup>  | 2.918    | H(8A) | H(73) <sup>3)</sup>  | 3.568    |

Table 10. Distances beyond the asymmetric unit out to 3.60 Å involving hydrogens (continued)

| atom   | atom                | distance | atom   | atom                 | distance |
|--------|---------------------|----------|--------|----------------------|----------|
| H(8B)  | C(74) <sup>4)</sup> | 3.577    | H(8B)  | C(75) <sup>4)</sup>  | 2.942    |
| H(8B)  | C(76) <sup>4)</sup> | 3.194    | H(8B)  | H(7B) <sup>12)</sup> | 3.543    |
| H(8B)  | H(71) <sup>4)</sup> | 2.868    | H(8B)  | H(72) <sup>4)</sup>  | 3.290    |
| H(9A)  | C(74) <sup>4)</sup> | 3.155    | H(9A)  | C(75) <sup>4)</sup>  | 2.965    |
| H(9A)  | C(76) <sup>4)</sup> | 3.401    | H(9A)  | H(7B) <sup>12)</sup> | 3.473    |
| H(9A)  | H(70) <sup>4)</sup> | 3.397    | H(9A)  | H(71) <sup>4)</sup>  | 3.095    |
| H(10A) | C(75) <sup>4)</sup> | 3.270    | H(10A) | H(71) <sup>4)</sup>  | 2.676    |
| H(10B) | C(75) <sup>4)</sup> | 3.222    | H(10B) | H(71) <sup>4)</sup>  | 2.488    |
| H(11B) | C(75) <sup>4)</sup> | 3.404    | H(11B) | H(61) <sup>2)</sup>  | 3.183    |
| H(11B) | H(70) <sup>4)</sup> | 3.387    | H(11B) | H(71) <sup>4)</sup>  | 2.915    |
| H(12)  | C(21) <sup>6)</sup> | 3.237    | H(12)  | C(22) <sup>6)</sup>  | 2.794    |
| H(12)  | C(23) <sup>6)</sup> | 3.211    | H(12)  | H(20) <sup>6)</sup>  | 3.451    |
| H(12)  | H(27) <sup>6)</sup> | 3.490    | H(12)  | H(28) <sup>6)</sup>  | 2.790    |
| H(12)  | H(29) <sup>6)</sup> | 3.421    | H(13)  | H(33) <sup>9)</sup>  | 3.511    |
| H(14)  | C(29) <sup>9)</sup> | 3.550    | H(14)  | C(31) <sup>9)</sup>  | 3.464    |
| H(14)  | C(32) <sup>9)</sup> | 3.542    | H(14)  | H(34) <sup>9)</sup>  | 3.026    |
| H(14)  | H(35) <sup>9)</sup> | 3.552    | H(15)  | H(36) <sup>9)</sup>  | 3.441    |
| H(15)  | H(76) <sup>3)</sup> | 3.585    | H(16)  | C(72)                | 3.356    |
| H(16)  | C(77)               | 3.416    | H(16)  | H(73)                | 3.597    |
| H(16)  | H(75)               | 3.111    | H(17)  | C(72)                | 3.118    |
| H(17)  | C(73)               | 2.984    | H(17)  | C(74)                | 3.087    |
| H(17)  | C(75)               | 3.303    | H(17)  | C(76)                | 3.424    |
| H(17)  | C(77)               | 3.326    | H(17)  | H(57) <sup>5)</sup>  | 3.488    |
| H(17)  | H(69)               | 3.390    | H(17)  | H(70)                | 3.537    |
| H(17)  | H(75)               | 3.549    | H(18)  | C(58) <sup>5)</sup>  | 3.273    |
| H(18)  | H(57) <sup>5)</sup> | 2.331    | H(19)  | C(33) <sup>5)</sup>  | 3.498    |
| H(19)  | C(58) <sup>5)</sup> | 3.511    | H(19)  | H(37) <sup>5)</sup>  | 2.771    |
| H(19)  | H(57) <sup>5)</sup> | 2.740    | H(19)  | H(75)                | 3.092    |
| H(20)  | C(23) <sup>6)</sup> | 3.439    | H(20)  | C(28) <sup>7)</sup>  | 3.527    |
| H(20)  | H(12) <sup>6)</sup> | 3.451    | H(20)  | H(28) <sup>6)</sup>  | 3.441    |
| H(20)  | H(29) <sup>6)</sup> | 2.670    | H(20)  | H(33) <sup>7)</sup>  | 2.590    |
| H(21)  | C(27) <sup>7)</sup> | 3.182    | H(21)  | C(28) <sup>7)</sup>  | 3.195    |
| H(21)  | C(56) <sup>6)</sup> | 3.228    | H(21)  | H(28) <sup>6)</sup>  | 3.574    |
| H(21)  | H(29) <sup>6)</sup> | 3.239    | H(21)  | H(32) <sup>7)</sup>  | 2.577    |
| H(21)  | H(33) <sup>7)</sup> | 2.599    | H(21)  | H(55) <sup>6)</sup>  | 2.323    |
| H(22)  | C(5A) <sup>1)</sup> | 3.551    | H(22)  | C(63) <sup>3)</sup>  | 3.049    |
| H(22)  | H(4A) <sup>1)</sup> | 3.110    | H(22)  | H(6A) <sup>1)</sup>  | 3.209    |

Table 10. Distances beyond the asymmetric unit out to 3.60 Å involving hydrogens  
(continued)

| atom  | atom                 | distance | atom  | atom                 | distance |
|-------|----------------------|----------|-------|----------------------|----------|
| H(22) | H(7A) <sup>1)</sup>  | 3.172    | H(22) | H(51) <sup>3)</sup>  | 3.411    |
| H(22) | H(52) <sup>3)</sup>  | 3.033    | H(22) | H(55) <sup>6)</sup>  | 3.198    |
| H(22) | H(61) <sup>3)</sup>  | 2.329    | H(22) | H(62) <sup>3)</sup>  | 3.573    |
| H(23) | C(78) <sup>3)</sup>  | 3.040    | H(23) | H(4A) <sup>1)</sup>  | 3.301    |
| H(23) | H(52) <sup>3)</sup>  | 2.793    | H(23) | H(60) <sup>3)</sup>  | 3.479    |
| H(23) | H(61) <sup>3)</sup>  | 3.285    | H(23) | H(74) <sup>3)</sup>  | 2.332    |
| H(23) | H(75) <sup>3)</sup>  | 3.122    | H(23) | H(76) <sup>3)</sup>  | 3.239    |
| H(24) | H(74) <sup>3)</sup>  | 3.387    | H(24) | H(76) <sup>3)</sup>  | 3.271    |
| H(25) | H(42) <sup>7)</sup>  | 2.979    | H(26) | C(34) <sup>7)</sup>  | 3.530    |
| H(26) | C(38) <sup>7)</sup>  | 3.023    | H(26) | C(39) <sup>7)</sup>  | 3.155    |
| H(26) | H(34) <sup>7)</sup>  | 3.317    | H(26) | H(38) <sup>7)</sup>  | 3.141    |
| H(26) | H(39) <sup>7)</sup>  | 3.473    | H(26) | H(41) <sup>7)</sup>  | 2.822    |
| H(26) | H(42) <sup>7)</sup>  | 3.062    | H(27) | C(33) <sup>7)</sup>  | 2.984    |
| H(27) | C(34) <sup>7)</sup>  | 2.756    | H(27) | C(35) <sup>7)</sup>  | 3.586    |
| H(27) | C(52) <sup>8)</sup>  | 3.572    | H(27) | H(12) <sup>6)</sup>  | 3.490    |
| H(27) | H(34) <sup>7)</sup>  | 3.575    | H(27) | H(37) <sup>7)</sup>  | 2.970    |
| H(27) | H(38) <sup>7)</sup>  | 2.567    | H(27) | H(52) <sup>8)</sup>  | 3.361    |
| H(28) | C(12) <sup>6)</sup>  | 3.053    | H(28) | C(13) <sup>6)</sup>  | 2.981    |
| H(28) | C(14) <sup>6)</sup>  | 3.059    | H(28) | C(15) <sup>6)</sup>  | 3.169    |
| H(28) | C(16) <sup>6)</sup>  | 3.208    | H(28) | C(17) <sup>6)</sup>  | 3.158    |
| H(28) | C(51) <sup>8)</sup>  | 3.513    | H(28) | C(52) <sup>8)</sup>  | 3.335    |
| H(28) | H(12) <sup>6)</sup>  | 2.790    | H(28) | H(20) <sup>6)</sup>  | 3.441    |
| H(28) | H(21) <sup>6)</sup>  | 3.574    | H(28) | H(51) <sup>8)</sup>  | 3.096    |
| H(28) | H(52) <sup>8)</sup>  | 2.749    | H(29) | C(13) <sup>6)</sup>  | 2.897    |
| H(29) | C(14) <sup>6)</sup>  | 3.213    | H(29) | H(12) <sup>6)</sup>  | 3.421    |
| H(29) | H(20) <sup>6)</sup>  | 2.670    | H(29) | H(21) <sup>6)</sup>  | 3.239    |
| H(29) | H(29) <sup>6)</sup>  | 3.559    | H(30) | H(76) <sup>3)</sup>  | 2.878    |
| H(31) | C(72) <sup>3)</sup>  | 3.132    | H(31) | C(73) <sup>3)</sup>  | 3.116    |
| H(31) | C(78) <sup>3)</sup>  | 3.201    | H(31) | H(69) <sup>3)</sup>  | 3.031    |
| H(31) | H(74) <sup>3)</sup>  | 3.512    | H(31) | H(76) <sup>3)</sup>  | 2.572    |
| H(32) | C(14) <sup>10)</sup> | 3.324    | H(32) | H(7A) <sup>12)</sup> | 3.002    |
| H(32) | H(21) <sup>10)</sup> | 2.577    | H(32) | H(65) <sup>10)</sup> | 3.463    |
| H(32) | H(69) <sup>3)</sup>  | 3.307    | H(33) | C(13) <sup>10)</sup> | 3.163    |
| H(33) | C(14) <sup>10)</sup> | 3.173    | H(33) | H(13) <sup>9)</sup>  | 3.511    |
| H(33) | H(20) <sup>10)</sup> | 2.590    | H(33) | H(21) <sup>10)</sup> | 2.599    |
| H(33) | H(35) <sup>9)</sup>  | 3.338    | H(34) | H(14) <sup>9)</sup>  | 3.026    |
| H(34) | H(26) <sup>10)</sup> | 3.317    | H(34) | H(27) <sup>10)</sup> | 3.575    |

Table 10. Distances beyond the asymmetric unit out to 3.60 Å involving hydrogens (continued)

| atom  | atom                 | distance | atom  | atom                 | distance |
|-------|----------------------|----------|-------|----------------------|----------|
| H(34) | H(35) <sup>9)</sup>  | 3.280    | H(35) | C(28) <sup>9)</sup>  | 3.246    |
| H(35) | C(29) <sup>9)</sup>  | 3.212    | H(35) | H(14) <sup>9)</sup>  | 3.552    |
| H(35) | H(33) <sup>9)</sup>  | 3.338    | H(35) | H(34) <sup>9)</sup>  | 3.280    |
| H(36) | C(25) <sup>9)</sup>  | 3.437    | H(36) | C(26) <sup>9)</sup>  | 3.287    |
| H(36) | C(27) <sup>9)</sup>  | 3.374    | H(36) | C(73) <sup>5)</sup>  | 3.567    |
| H(36) | C(78) <sup>5)</sup>  | 3.464    | H(36) | H(15) <sup>9)</sup>  | 3.441    |
| H(36) | H(69) <sup>5)</sup>  | 2.713    | H(36) | H(75) <sup>5)</sup>  | 3.436    |
| H(36) | H(76) <sup>5)</sup>  | 2.749    | H(37) | C(53) <sup>5)</sup>  | 3.300    |
| H(37) | C(78) <sup>5)</sup>  | 3.465    | H(37) | H(19) <sup>5)</sup>  | 2.771    |
| H(37) | H(27) <sup>10)</sup> | 2.970    | H(37) | H(52) <sup>5)</sup>  | 3.550    |
| H(37) | H(53) <sup>5)</sup>  | 2.846    | H(37) | H(58) <sup>5)</sup>  | 3.151    |
| H(37) | H(75) <sup>5)</sup>  | 2.802    | H(37) | H(76) <sup>5)</sup>  | 3.267    |
| H(38) | C(21) <sup>10)</sup> | 3.339    | H(38) | C(58) <sup>5)</sup>  | 2.995    |
| H(38) | C(59) <sup>5)</sup>  | 3.091    | H(38) | H(26) <sup>10)</sup> | 3.141    |
| H(38) | H(27) <sup>10)</sup> | 2.567    | H(38) | H(57) <sup>5)</sup>  | 2.692    |
| H(38) | H(58) <sup>5)</sup>  | 2.854    | H(39) | H(26) <sup>10)</sup> | 3.473    |
| H(39) | H(57) <sup>5)</sup>  | 3.434    | H(40) | C(74)                | 3.428    |
| H(40) | H(56) <sup>5)</sup>  | 3.304    | H(40) | H(57) <sup>5)</sup>  | 2.883    |
| H(40) | H(70)                | 3.323    | H(41) | C(64) <sup>10)</sup> | 3.135    |
| H(41) | C(65) <sup>10)</sup> | 3.304    | H(41) | H(26) <sup>10)</sup> | 2.822    |
| H(41) | H(47) <sup>4)</sup>  | 3.168    | H(41) | H(62) <sup>10)</sup> | 2.543    |
| H(41) | H(63) <sup>10)</sup> | 2.868    | H(42) | C(66) <sup>10)</sup> | 3.295    |
| H(42) | C(67) <sup>10)</sup> | 3.349    | H(42) | C(68) <sup>10)</sup> | 3.248    |
| H(42) | C(69) <sup>10)</sup> | 3.052    | H(42) | C(70) <sup>10)</sup> | 2.935    |
| H(42) | C(71) <sup>10)</sup> | 3.046    | H(42) | H(25) <sup>10)</sup> | 2.979    |
| H(42) | H(26) <sup>10)</sup> | 3.062    | H(42) | H(47) <sup>4)</sup>  | 3.420    |
| H(42) | H(63) <sup>10)</sup> | 3.046    | H(42) | H(66) <sup>10)</sup> | 3.529    |
| H(42) | H(67) <sup>10)</sup> | 3.349    | H(42) | H(68) <sup>10)</sup> | 3.504    |
| H(43) | C(68) <sup>10)</sup> | 3.533    | H(43) | C(69) <sup>10)</sup> | 2.960    |
| H(43) | C(70) <sup>10)</sup> | 3.457    | H(43) | H(66) <sup>10)</sup> | 2.746    |
| H(43) | H(67) <sup>10)</sup> | 3.587    | H(43) | H(72) <sup>4)</sup>  | 3.118    |
| H(45) | C(43) <sup>4)</sup>  | 3.545    | H(45) | C(44) <sup>4)</sup>  | 3.156    |
| H(45) | C(75)                | 3.343    | H(45) | C(76)                | 3.369    |
| H(45) | H(45) <sup>4)</sup>  | 3.148    | H(45) | H(46) <sup>4)</sup>  | 2.357    |
| H(45) | H(71)                | 3.176    | H(45) | H(71) <sup>4)</sup>  | 3.567    |
| H(45) | H(72)                | 3.231    | H(46) | C(37) <sup>4)</sup>  | 3.445    |
| H(46) | C(38) <sup>4)</sup>  | 3.288    | H(46) | C(39) <sup>4)</sup>  | 3.337    |

Table 10. Distances beyond the asymmetric unit out to 3.60 Å involving hydrogens (continued)

| atom  | atom                 | distance | atom  | atom                 | distance |
|-------|----------------------|----------|-------|----------------------|----------|
| H(46) | C(40) <sup>4)</sup>  | 3.527    | H(46) | C(43) <sup>4)</sup>  | 3.228    |
| H(46) | C(75) <sup>4)</sup>  | 3.448    | H(46) | H(45) <sup>4)</sup>  | 2.357    |
| H(46) | H(46) <sup>4)</sup>  | 3.474    | H(46) | H(67) <sup>2)</sup>  | 3.462    |
| H(46) | H(71) <sup>4)</sup>  | 2.721    | H(46) | H(72)                | 3.179    |
| H(47) | C(38) <sup>4)</sup>  | 3.385    | H(47) | C(39) <sup>4)</sup>  | 3.526    |
| H(47) | C(63) <sup>2)</sup>  | 3.120    | H(47) | C(64) <sup>2)</sup>  | 2.827    |
| H(47) | C(65) <sup>2)</sup>  | 3.149    | H(47) | C(70) <sup>2)</sup>  | 3.599    |
| H(47) | C(71) <sup>2)</sup>  | 3.270    | H(47) | H(41) <sup>4)</sup>  | 3.168    |
| H(47) | H(42) <sup>4)</sup>  | 3.420    | H(47) | H(61) <sup>2)</sup>  | 3.437    |
| H(47) | H(62) <sup>2)</sup>  | 3.001    | H(47) | H(63) <sup>2)</sup>  | 3.498    |
| H(47) | H(67) <sup>2)</sup>  | 3.357    | H(47) | H(68) <sup>2)</sup>  | 2.724    |
| H(47) | H(71) <sup>4)</sup>  | 3.491    | H(48) | C(61) <sup>2)</sup>  | 3.303    |
| H(48) | C(62) <sup>2)</sup>  | 3.052    | H(48) | C(63) <sup>2)</sup>  | 3.335    |
| H(48) | H(60) <sup>2)</sup>  | 3.245    | H(48) | H(68) <sup>2)</sup>  | 2.740    |
| H(49) | H(51) <sup>8)</sup>  | 3.433    | H(50) | C(49) <sup>8)</sup>  | 3.536    |
| H(50) | C(50) <sup>8)</sup>  | 3.096    | H(50) | C(51) <sup>8)</sup>  | 3.339    |
| H(50) | H(50) <sup>8)</sup>  | 3.167    | H(50) | H(51) <sup>8)</sup>  | 3.530    |
| H(51) | C(22) <sup>8)</sup>  | 3.371    | H(51) | C(55) <sup>8)</sup>  | 3.300    |
| H(51) | C(56) <sup>8)</sup>  | 2.860    | H(51) | C(57) <sup>8)</sup>  | 3.480    |
| H(51) | H(22) <sup>11)</sup> | 3.411    | H(51) | H(28) <sup>8)</sup>  | 3.096    |
| H(51) | H(49) <sup>8)</sup>  | 3.433    | H(51) | H(50) <sup>8)</sup>  | 3.530    |
| H(51) | H(54) <sup>8)</sup>  | 3.412    | H(51) | H(55) <sup>8)</sup>  | 2.664    |
| H(52) | C(15) <sup>11)</sup> | 3.083    | H(52) | C(16) <sup>11)</sup> | 2.949    |
| H(52) | C(22) <sup>8)</sup>  | 3.422    | H(52) | H(22) <sup>11)</sup> | 3.033    |
| H(52) | H(23) <sup>11)</sup> | 2.793    | H(52) | H(27) <sup>8)</sup>  | 3.361    |
| H(52) | H(28) <sup>8)</sup>  | 2.749    | H(52) | H(37) <sup>5)</sup>  | 3.550    |
| H(52) | H(74)                | 3.578    | H(52) | H(75)                | 2.935    |
| H(53) | C(78)                | 3.104    | H(53) | H(37) <sup>5)</sup>  | 2.846    |
| H(53) | H(74)                | 3.472    | H(53) | H(75)                | 2.147    |
| H(54) | H(51) <sup>8)</sup>  | 3.412    | H(55) | C(14) <sup>6)</sup>  | 2.917    |
| H(55) | C(15) <sup>6)</sup>  | 3.372    | H(55) | C(51) <sup>8)</sup>  | 3.587    |
| H(55) | H(21) <sup>6)</sup>  | 2.323    | H(55) | H(22) <sup>6)</sup>  | 3.198    |
| H(55) | H(51) <sup>8)</sup>  | 2.664    | H(56) | C(73) <sup>5)</sup>  | 3.092    |
| H(56) | C(74) <sup>5)</sup>  | 3.013    | H(56) | H(40) <sup>5)</sup>  | 3.304    |
| H(56) | H(62) <sup>8)</sup>  | 3.475    | H(56) | H(69) <sup>5)</sup>  | 2.577    |
| H(56) | H(70) <sup>5)</sup>  | 2.428    | H(57) | C(11) <sup>5)</sup>  | 2.960    |
| H(57) | C(34) <sup>5)</sup>  | 3.246    | H(57) | C(59) <sup>5)</sup>  | 3.600    |



Table 10. Distances beyond the asymmetric unit out to 3.60 Å involving hydrogens  
(continued)

| atom  | atom                 | distance | atom  | atom                 | distance |
|-------|----------------------|----------|-------|----------------------|----------|
| H(57) | H(17) <sup>5)</sup>  | 3.488    | H(57) | H(18) <sup>5)</sup>  | 2.331    |
| H(57) | H(19) <sup>5)</sup>  | 2.740    | H(57) | H(38) <sup>5)</sup>  | 2.692    |
| H(57) | H(39) <sup>5)</sup>  | 3.434    | H(57) | H(40) <sup>5)</sup>  | 2.883    |
| H(57) | H(58) <sup>5)</sup>  | 2.724    | H(57) | H(69) <sup>5)</sup>  | 3.572    |
| H(58) | C(33) <sup>5)</sup>  | 3.398    | H(58) | C(34) <sup>5)</sup>  | 3.237    |
| H(58) | C(58) <sup>5)</sup>  | 3.235    | H(58) | C(59) <sup>5)</sup>  | 3.160    |
| H(58) | H(37) <sup>5)</sup>  | 3.151    | H(58) | H(38) <sup>5)</sup>  | 2.854    |
| H(58) | H(57) <sup>5)</sup>  | 2.724    | H(58) | H(58) <sup>5)</sup>  | 2.575    |
| H(59) | C(70) <sup>2)</sup>  | 3.135    | H(59) | C(71) <sup>2)</sup>  | 3.489    |
| H(59) | C(77)                | 3.508    | H(59) | H(67) <sup>2)</sup>  | 2.482    |
| H(59) | H(68) <sup>2)</sup>  | 3.173    | H(59) | H(73)                | 3.053    |
| H(60) | C(69) <sup>2)</sup>  | 3.566    | H(60) | C(70) <sup>2)</sup>  | 3.075    |
| H(60) | C(71) <sup>2)</sup>  | 3.508    | H(60) | H(3A) <sup>2)</sup>  | 3.312    |
| H(60) | H(4A) <sup>2)</sup>  | 3.275    | H(60) | H(5B) <sup>11)</sup> | 3.047    |
| H(60) | H(23) <sup>11)</sup> | 3.479    | H(60) | H(48) <sup>2)</sup>  | 3.245    |
| H(60) | H(67) <sup>2)</sup>  | 2.960    | H(60) | H(73)                | 2.814    |
| H(60) | H(74)                | 3.229    | H(61) | C(4A) <sup>2)</sup>  | 3.426    |
| H(61) | C(5A) <sup>2)</sup>  | 3.424    | H(61) | C(15) <sup>11)</sup> | 3.180    |
| H(61) | H(3A) <sup>2)</sup>  | 3.217    | H(61) | H(4A) <sup>2)</sup>  | 2.829    |
| H(61) | H(6A) <sup>2)</sup>  | 2.705    | H(61) | H(11B) <sup>2)</sup> | 3.183    |
| H(61) | H(22) <sup>11)</sup> | 2.329    | H(61) | H(23) <sup>11)</sup> | 3.285    |
| H(61) | H(47) <sup>2)</sup>  | 3.437    | H(62) | C(38) <sup>7)</sup>  | 3.435    |
| H(62) | H(22) <sup>11)</sup> | 3.573    | H(62) | H(41) <sup>7)</sup>  | 2.543    |
| H(62) | H(47) <sup>2)</sup>  | 3.001    | H(62) | H(56) <sup>8)</sup>  | 3.475    |
| H(62) | H(70) <sup>7)</sup>  | 3.574    | H(63) | C(38) <sup>7)</sup>  | 3.565    |
| H(63) | H(41) <sup>7)</sup>  | 2.868    | H(63) | H(42) <sup>7)</sup>  | 3.046    |
| H(63) | H(47) <sup>2)</sup>  | 3.498    | H(65) | C(4A) <sup>1)</sup>  | 3.286    |
| H(65) | C(5A) <sup>1)</sup>  | 3.244    | H(65) | H(4A) <sup>1)</sup>  | 3.209    |
| H(65) | H(5A) <sup>1)</sup>  | 2.919    | H(65) | H(6B) <sup>1)</sup>  | 3.110    |
| H(65) | H(7A) <sup>1)</sup>  | 2.450    | H(65) | H(32) <sup>7)</sup>  | 3.463    |
| H(66) | C(4B) <sup>1)</sup>  | 3.399    | H(66) | C(5B) <sup>1)</sup>  | 3.032    |
| H(66) | C(40) <sup>7)</sup>  | 3.524    | H(66) | C(76) <sup>2)</sup>  | 3.386    |
| H(66) | C(77) <sup>2)</sup>  | 3.250    | H(66) | H(5A) <sup>1)</sup>  | 3.107    |
| H(66) | H(5B) <sup>1)</sup>  | 2.811    | H(66) | H(6B) <sup>1)</sup>  | 2.695    |
| H(66) | H(7A) <sup>1)</sup>  | 3.121    | H(66) | H(7B) <sup>1)</sup>  | 2.753    |
| H(66) | H(8A) <sup>1)</sup>  | 2.918    | H(66) | H(42) <sup>7)</sup>  | 3.529    |
| H(66) | H(43) <sup>7)</sup>  | 2.746    | H(66) | H(72) <sup>2)</sup>  | 2.928    |

Table 10. Distances beyond the asymmetric unit out to 3.60 Å involving hydrogens (continued)

| atom  | atom                 | distance | atom  | atom                 | distance |
|-------|----------------------|----------|-------|----------------------|----------|
| H(66) | H(73) <sup>2)</sup>  | 2.644    | H(67) | C(44) <sup>2)</sup>  | 3.227    |
| H(67) | C(45) <sup>2)</sup>  | 3.139    | H(67) | C(46) <sup>2)</sup>  | 3.513    |
| H(67) | C(61) <sup>2)</sup>  | 3.191    | H(67) | C(62) <sup>2)</sup>  | 3.421    |
| H(67) | C(76) <sup>2)</sup>  | 3.128    | H(67) | C(77) <sup>2)</sup>  | 3.108    |
| H(67) | H(42) <sup>7)</sup>  | 3.349    | H(67) | H(43) <sup>7)</sup>  | 3.587    |
| H(67) | H(46) <sup>2)</sup>  | 3.462    | H(67) | H(47) <sup>2)</sup>  | 3.357    |
| H(67) | H(59) <sup>2)</sup>  | 2.482    | H(67) | H(60) <sup>2)</sup>  | 2.960    |
| H(67) | H(72) <sup>2)</sup>  | 2.572    | H(67) | H(73) <sup>2)</sup>  | 2.519    |
| H(68) | C(45) <sup>2)</sup>  | 2.920    | H(68) | C(46) <sup>2)</sup>  | 2.937    |
| H(68) | C(61) <sup>2)</sup>  | 3.526    | H(68) | H(42) <sup>7)</sup>  | 3.504    |
| H(68) | H(47) <sup>2)</sup>  | 2.724    | H(68) | H(48) <sup>2)</sup>  | 2.740    |
| H(68) | H(59) <sup>2)</sup>  | 3.173    | H(68) | H(68) <sup>2)</sup>  | 3.509    |
| H(69) | C(26) <sup>11)</sup> | 3.360    | H(69) | C(27) <sup>11)</sup> | 3.512    |
| H(69) | C(32) <sup>5)</sup>  | 3.446    | H(69) | C(57) <sup>5)</sup>  | 3.085    |
| H(69) | H(17)                | 3.390    | H(69) | H(31) <sup>11)</sup> | 3.031    |
| H(69) | H(32) <sup>11)</sup> | 3.307    | H(69) | H(36) <sup>5)</sup>  | 2.713    |
| H(69) | H(56) <sup>5)</sup>  | 2.577    | H(69) | H(57) <sup>5)</sup>  | 3.572    |
| H(70) | C(57) <sup>5)</sup>  | 3.365    | H(70) | H(6A) <sup>4)</sup>  | 2.927    |
| H(70) | H(9A) <sup>4)</sup>  | 3.397    | H(70) | H(11B) <sup>4)</sup> | 3.387    |
| H(70) | H(17)                | 3.537    | H(70) | H(40)                | 3.323    |
| H(70) | H(56) <sup>5)</sup>  | 2.428    | H(70) | H(62) <sup>10)</sup> | 3.574    |
| H(71) | C(6B) <sup>4)</sup>  | 3.436    | H(71) | C(7A) <sup>4)</sup>  | 3.442    |
| H(71) | C(7B) <sup>4)</sup>  | 3.039    | H(71) | C(43) <sup>4)</sup>  | 3.369    |
| H(71) | C(44) <sup>4)</sup>  | 2.852    | H(71) | C(45) <sup>4)</sup>  | 3.331    |
| H(71) | H(6A) <sup>4)</sup>  | 3.306    | H(71) | H(8B) <sup>4)</sup>  | 2.868    |
| H(71) | H(9A) <sup>4)</sup>  | 3.095    | H(71) | H(10A) <sup>4)</sup> | 2.676    |
| H(71) | H(10B) <sup>4)</sup> | 2.488    | H(71) | H(11B) <sup>4)</sup> | 2.915    |
| H(71) | H(45)                | 3.176    | H(71) | H(45) <sup>4)</sup>  | 3.567    |
| H(71) | H(46) <sup>4)</sup>  | 2.721    | H(71) | H(47) <sup>4)</sup>  | 3.491    |
| H(72) | C(40) <sup>4)</sup>  | 3.434    | H(72) | C(43)                | 3.360    |
| H(72) | C(44)                | 3.339    | H(72) | C(69) <sup>2)</sup>  | 3.416    |
| H(72) | C(70) <sup>2)</sup>  | 3.248    | H(72) | H(8B) <sup>4)</sup>  | 3.290    |
| H(72) | H(43) <sup>4)</sup>  | 3.118    | H(72) | H(45)                | 3.231    |
| H(72) | H(46)                | 3.179    | H(72) | H(66) <sup>2)</sup>  | 2.928    |
| H(72) | H(67) <sup>2)</sup>  | 2.572    | H(73) | C(4B) <sup>11)</sup> | 3.269    |
| H(73) | C(5B) <sup>11)</sup> | 3.536    | H(73) | C(61)                | 3.546    |
| H(73) | C(62)                | 3.421    | H(73) | C(69) <sup>2)</sup>  | 3.128    |

Table 10. Distances beyond the asymmetric unit out to 3.60 Å involving hydrogens (continued)

| atom  | atom                 | distance | atom  | atom                 | distance |
|-------|----------------------|----------|-------|----------------------|----------|
| H(73) | C(70) <sup>2)</sup>  | 3.067    | H(73) | H(4B) <sup>11)</sup> | 3.237    |
| H(73) | H(5B) <sup>11)</sup> | 2.690    | H(73) | H(7B) <sup>11)</sup> | 2.958    |
| H(73) | H(8A) <sup>11)</sup> | 3.568    | H(73) | H(16)                | 3.597    |
| H(73) | H(59)                | 3.053    | H(73) | H(60)                | 2.814    |
| H(73) | H(66) <sup>2)</sup>  | 2.644    | H(73) | H(67) <sup>2)</sup>  | 2.519    |
| H(74) | C(4B) <sup>11)</sup> | 2.812    | H(74) | C(16) <sup>11)</sup> | 3.198    |
| H(74) | H(1A) <sup>11)</sup> | 2.984    | H(74) | H(4B) <sup>11)</sup> | 2.148    |
| H(74) | H(5B) <sup>11)</sup> | 2.627    | H(74) | H(7B) <sup>11)</sup> | 3.560    |
| H(74) | H(23) <sup>11)</sup> | 2.332    | H(74) | H(24) <sup>11)</sup> | 3.387    |
| H(74) | H(31) <sup>11)</sup> | 3.512    | H(74) | H(52)                | 3.578    |
| H(74) | H(53)                | 3.472    | H(74) | H(60)                | 3.229    |
| H(75) | C(52)                | 3.334    | H(75) | C(53)                | 2.955    |
| H(75) | H(16)                | 3.111    | H(75) | H(17)                | 3.549    |
| H(75) | H(19)                | 3.092    | H(75) | H(23) <sup>11)</sup> | 3.122    |
| H(75) | H(36) <sup>5)</sup>  | 3.436    | H(75) | H(37) <sup>5)</sup>  | 2.802    |
| H(75) | H(52)                | 2.935    | H(75) | H(53)                | 2.147    |
| H(76) | C(25) <sup>11)</sup> | 3.070    | H(76) | C(26) <sup>11)</sup> | 2.901    |
| H(76) | C(32) <sup>5)</sup>  | 3.499    | H(76) | H(1A) <sup>11)</sup> | 3.584    |
| H(76) | H(4B) <sup>11)</sup> | 2.858    | H(76) | H(15) <sup>11)</sup> | 3.585    |
| H(76) | H(23) <sup>11)</sup> | 3.239    | H(76) | H(24) <sup>11)</sup> | 3.271    |
| H(76) | H(30) <sup>11)</sup> | 2.878    | H(76) | H(31) <sup>11)</sup> | 2.572    |
| H(76) | H(36) <sup>5)</sup>  | 2.749    | H(76) | H(37) <sup>5)</sup>  | 3.267    |

Symmetry Operators:

- |                  |                    |
|------------------|--------------------|
| (1) -X+1,-Y,-Z   | (2) -X+1,-Y+1,-Z   |
| (3) X,Y-1,Z      | (4) -X,-Y+1,-Z     |
| (5) -X,-Y+1,-Z+1 | (6) -X+1,-Y,-Z+1   |
| (7) X+1,Y,Z      | (8) -X+1,-Y+1,-Z+1 |
| (9) -X,-Y,-Z+1   | (10) X-1,Y,Z       |
| (11) X,Y+1,Z     | (12) -X,-Y,-Z      |
